# Supplementary material for: Restoration of retinal regenerative potential of Müller glia by disrupting intercellular Prox1 transfer
Source: Springer Nature journal article supplement (doi:10.1038/s41467-025-58290-8), 2025-03-25
Supplement: MOESM1 [file 41467_2025_58290_MOESM1_ESM.pdf]

## Supplementary Information for

# Restoration of retinal regenerative potential of Müller glia by disrupting intercellular Prox1 transfer

Eun Jung Lee *et al.*

### **This file includes:**

- Supplementary Figure 1 – 24
- Supplementary Table 1
- Supplementary Material 1 and 2

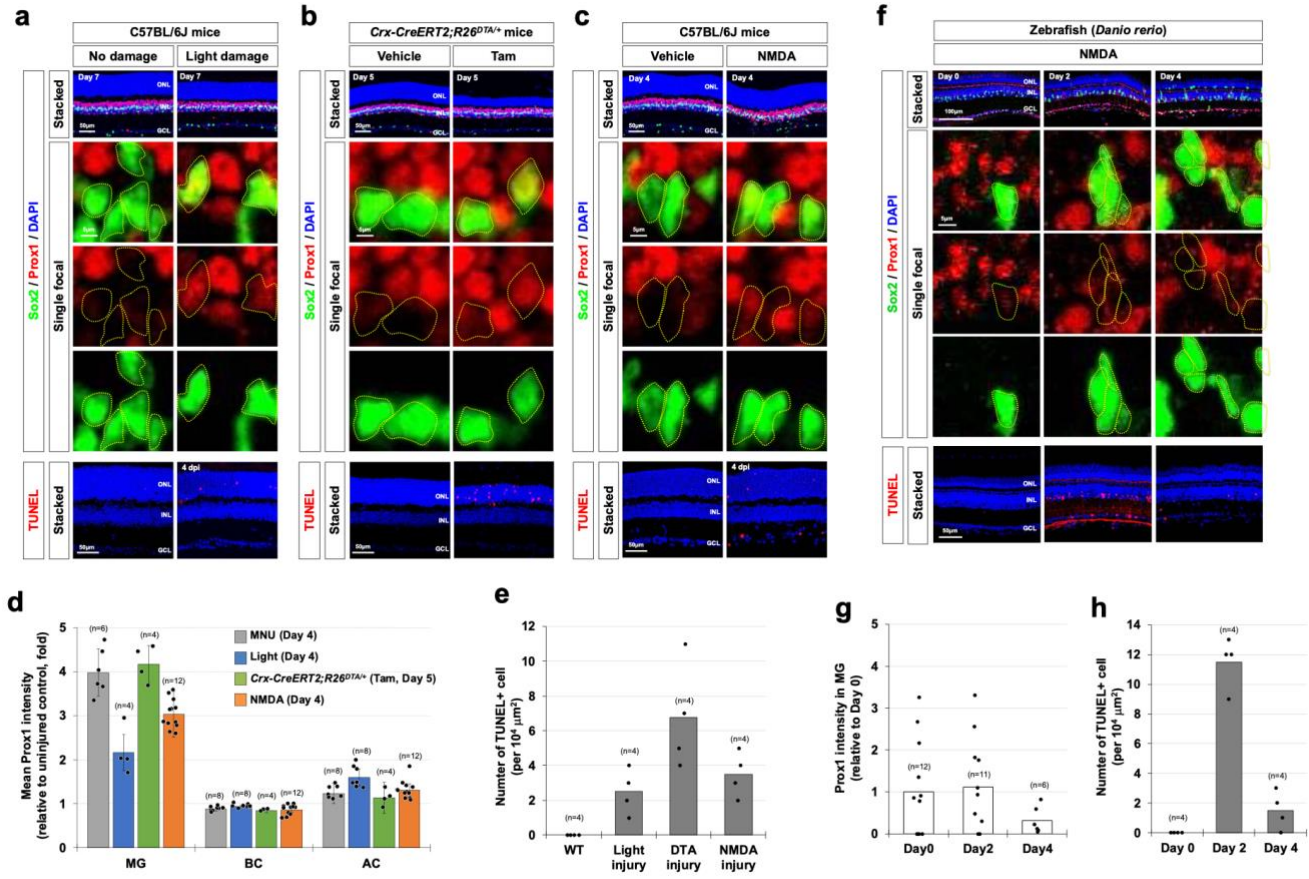

**Supplementary Figure 1. Upregulation of Prox1 in the MG of injured mouse retinas.** (a) P30 C57BL/6J mice, dark-adapted and with dilated pupils, were exposed to light (100,000 Lux) for 3 hours. (b) P30 *R26<sup>DTA/+</sup>;Crx-CreERT2* mice were administered Tam (75 mg/kg) to activate CreERT2, facilitating the deletion of the loxP-STOP-loxP (LSL) cassette to express diphtheria toxin A (DTA) in the photoreceptors. (c) P30 C57BL/6J mice were intravitreally injected with 0.5 μl of PBS (vehicle) or PBS containing NMDA (100 mM). After the days indicated in the images, the eyes were isolated for immunostaining to assess Prox1 expression. Sox2-positive MG cell nuclei are outlined by dotted lines. (d) Prox1 intensities in MG and ACs were normalized to that of BCs within the same images and their relative intensities to uninjured control mouse retinas are presented in the graph. Numbers of samples analyzed are shown in the graph (data from 3 independent litters). (e) The number of TUNEL(+) apoptotic cells per retinal area is presented in the graph. (f) Zebrafish retinas, aged 6 months, were injured via intraocular injection of 2 μl NMDA (100 mM). Distribution of Prox1 in these fish retinas was then assessed by immunostaining. (g) Prox1 intensities in MG were normalized to that of BCs within the same images and their relative intensities to uninjured control mouse retinas (Day 0) are presented in the graph. Numbers of samples analyzed are shown in the graph (data from 3 independent litters). (h) The number of TUNEL(+) apoptotic cells per retinal area is presented in the graph.

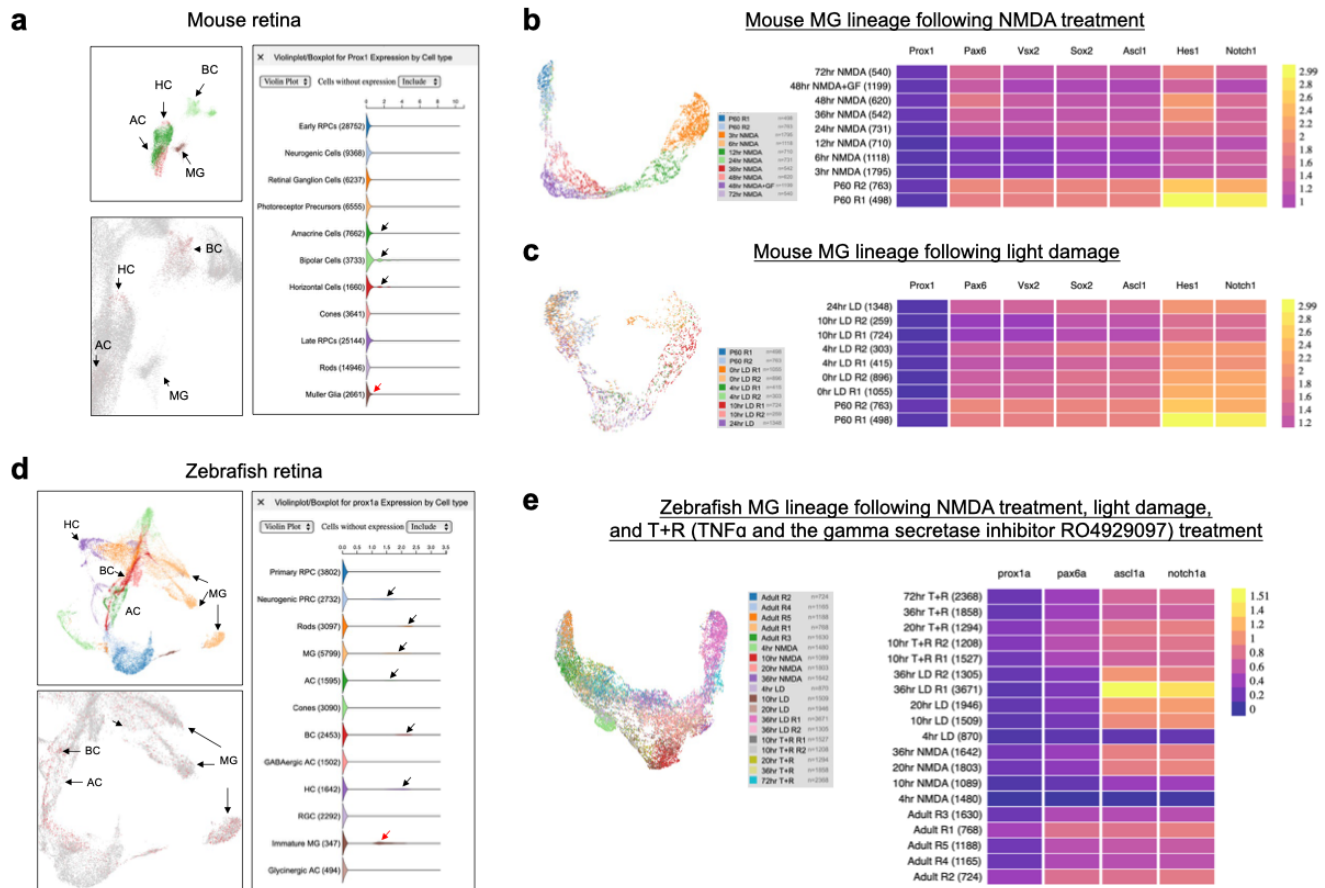

**Supplementary Figure 2. Insignificant changes in *Prox1* expression in MG of injured mouse and zebrafish retinas.** The presence of *Prox1*-expressing cells in mouse and zebrafish retinas was determined by analyzing single-cell RNA sequencing (scRNA-seq) data available at <https://proteinpaint.stjude.org/F/2019.retina.scRNA.html>. **(a)** In mouse retina, *Prox1* mRNA was detectable in BC, HC, and AC at significant level (black arrowheads); however, it was barely detectable in MG (red arrowheads). **(b and c)** Analysis of purified MG lineage cells from mouse retinas subjected to NMDA damage (b) or intense light damage (LD, c) revealed a scarce level of *Prox1* mRNA, which did not show significant changes following the injuries. **(d)** In zebrafish retina, *prox1a* mRNA was broadly detectable in neurogenic RPC, rods, MG, AC, BC, HC and immature MG. **(e)** In purified MG lineage cells from zebrafish retinas exposed to NMDA, LD or T+R, *prox1a* mRNA did not exhibit significant changes.

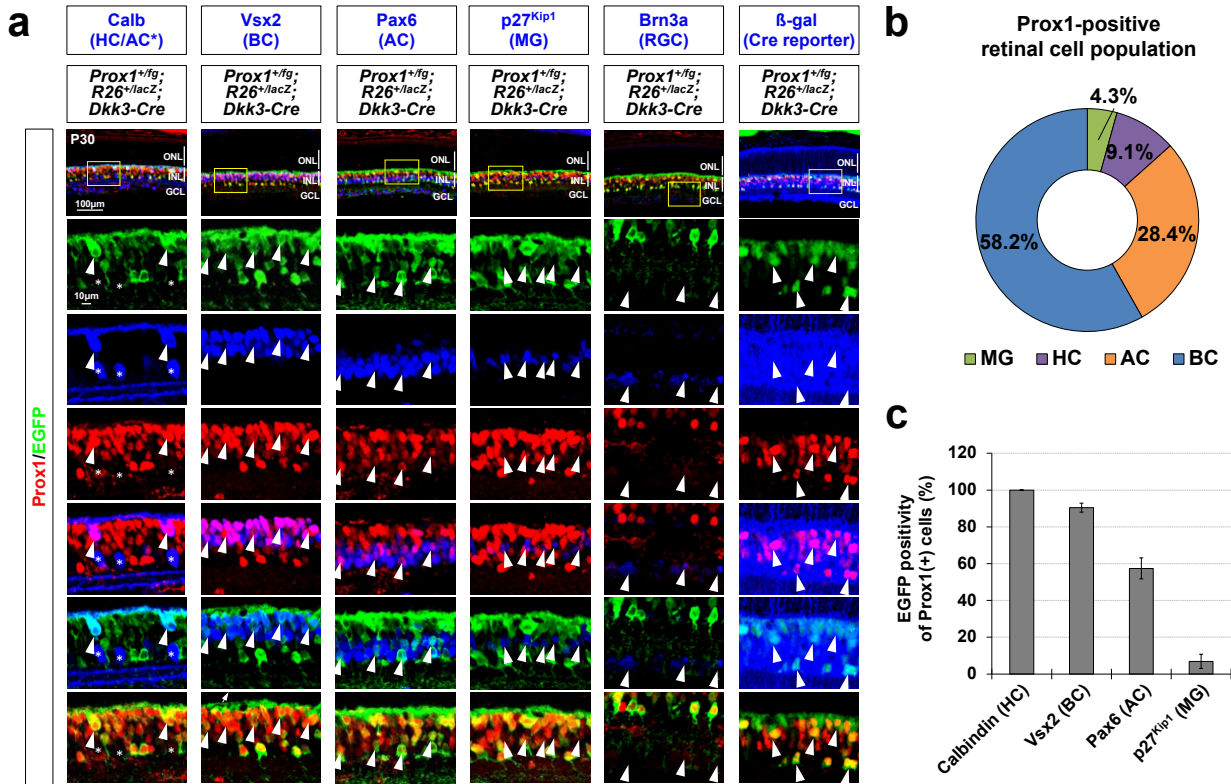

**Supplementary Figure 3. *Prox1* gene expression in HC, BC, and AC population in mouse retina.** (a) The distribution of *Prox1* and EGFP in the P30 *Prox1<sup>+/-</sup>fg;Dkk3-Cre* mouse retina was investigated. The identification of *Prox1*- and EGFP-expressing cells in the retinas was conducted through co-immunostaining with corresponding markers for each retinal cell type. Cells undergoing Cre-dependent DNA recombination were visualized by immunostaining for β-galactosidase (β-gal) expressed in the *R26<sup>+/lacZ</sup>* locus. Boxed areas in the images in the top row are magnified in the bottom rows. Arrowheads point *Prox1*(+);Marker(+) cells. (b) Numbers of cells expressing corresponding markers in the retinas of P30 *Prox1<sup>+/-</sup>fg;R26<sup>+/lacZ</sup>;Dkk3-Cre* mice counted and their ratio to total *Prox1*-expressing cell number was presented in the graph. (c) EGFP positivity of each *Prox1*-expressing retinal cell subset. Error bars represent SEM (n=6, 3 independent litters).

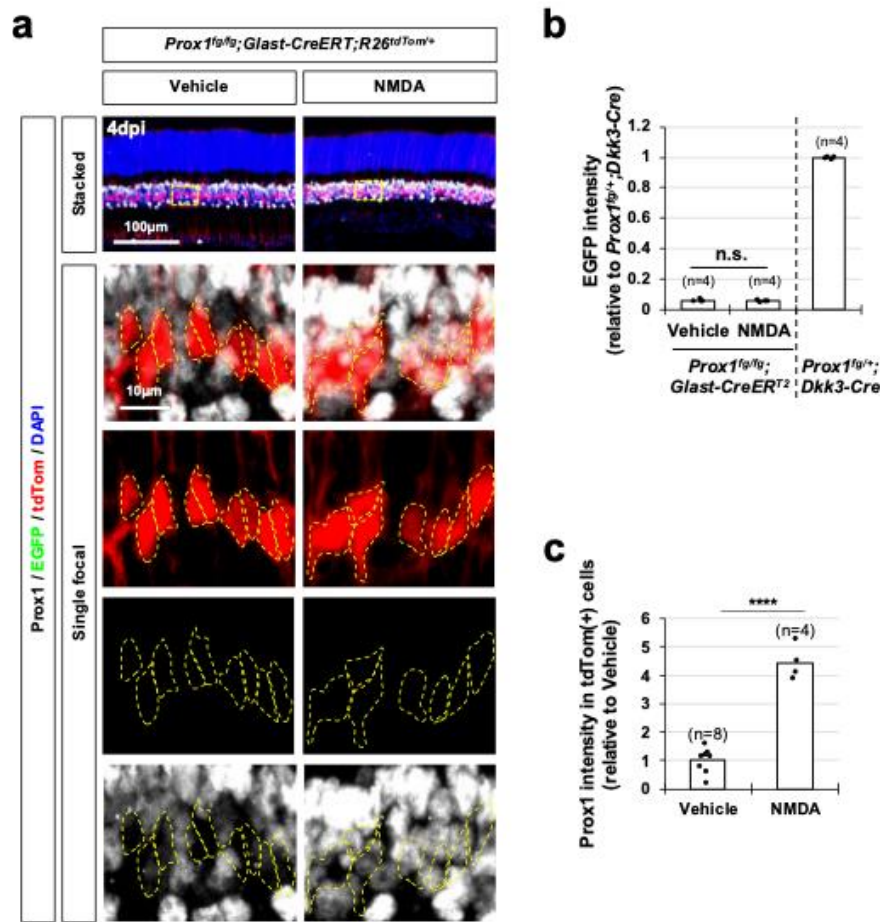

**Supplementary Figure 4. NMDA-induced accumulation of Prox1 protein in MG of *Prox1-cko* mice.** (a) *Prox1<sup>fg/fg</sup>;Glast-CreERT;R26<sup>+/tdTom</sup>* (*Prox1-cko*) littermate mice were administered Tam at P21 and P22 to activate CreERT recombinase, leading to the deletion of Prox1 in the MG population prior to NMDA injection at P26. The endogenous expression of Prox1 in MG was indirectly determined by assessing EGFP expression in the *Prox1* gene locus. Boxed areas in top row are magnified in the next rows. The tdTom-positive cell bodies are outlined by dotted lines. (b) EGFP intensity of tdTom-positive cell body area was measured and the relative intensity to EGFP intensity of *Prox1<sup>fg/fg</sup>;Dkk3-Cre* mouse retina was presented in the graph. (c) The graph illustrates Prox1 intensity in MG relative to Prox1 intensity in MG of Vehicle-treated littermate mouse retina. Numbers of samples analyzed are shown in the graphs (data from 2 independent litters). P-values were calculated using one-sided Student's t-test (\*\*\*\*  $p < 0.001$ ; n.s.  $> 0.05$ ).



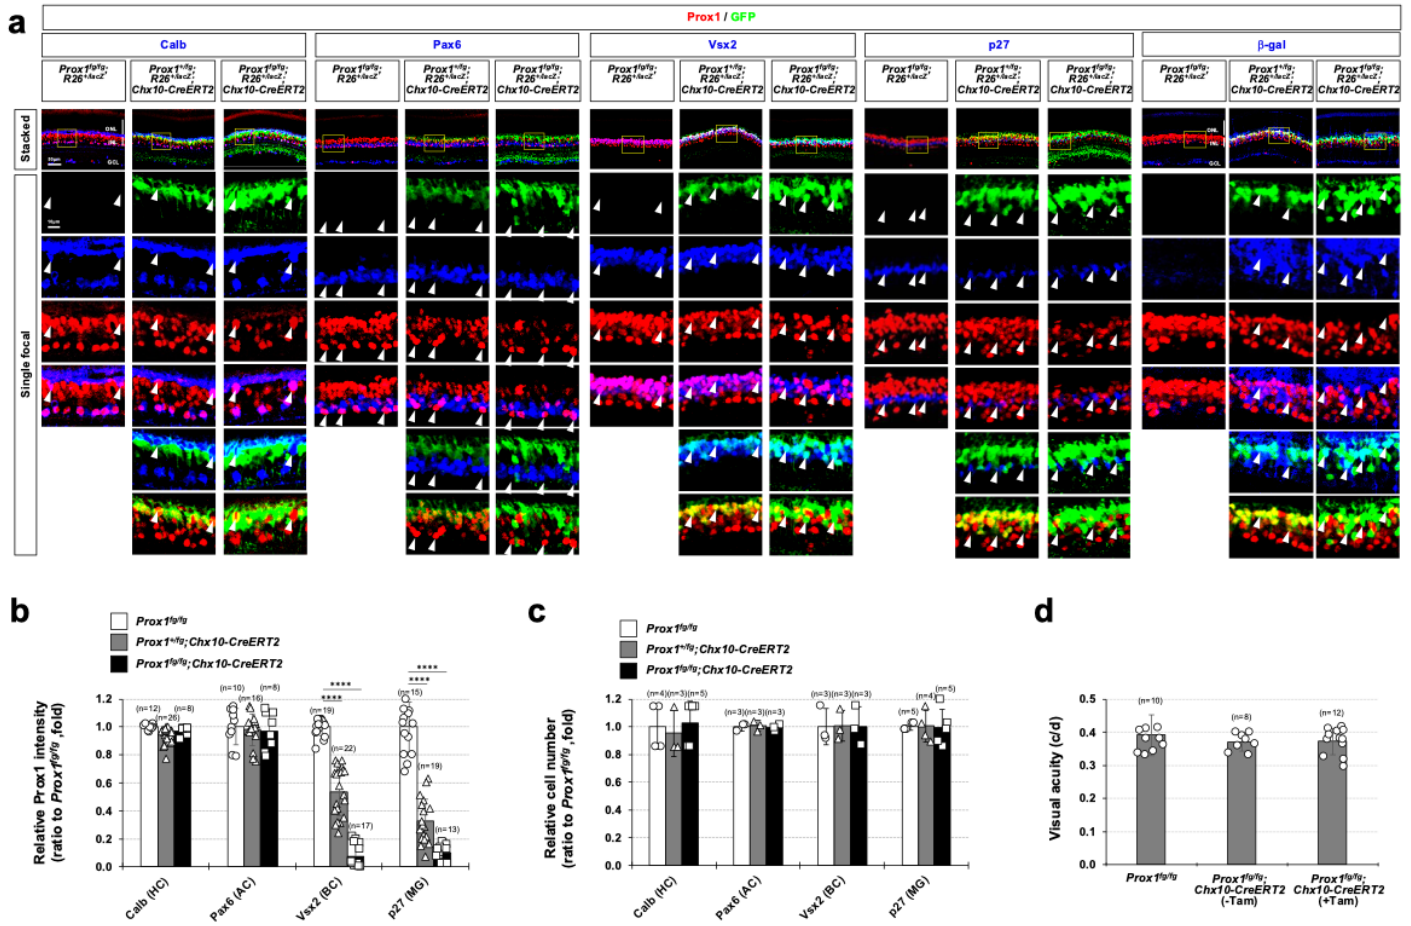

**Supplementary Figure 5. Deletion of *Prox1* in the BC population of *Prox1<sup>tg/tg</sup>;Chx10-CreERT2* mouse retinas.** (a) Mice with the indicated genotypes were injected with Tam at P21, P22, and P23 to activate Chx10-CreERT2 recombinase, which is selectively expressed in BC population. The CreERT2-dependent expression of EGFP in the *Prox1<sup>tg</sup>* knock-in allele was assessed by confocal microscopy of eye sections from P40 mice. Cells underwent Cre-dependent DNA recombination were visualized by immunostaining for  $\beta$ -gal Cre reporter. Boxed areas in the images in the top row are magnified in the bottom rows. Arrowheads point Prox1;Marker(+) cells. (b) The graph illustrates Prox1 intensities in HC, AC, BC, and MG relative to those in *Prox1<sup>tg</sup>* mice. (c) Number of cells expressing corresponding markers in the mouse retinas were counted and their ratio to the number in the retinas of P30 *Prox1<sup>tg/tg</sup>* littermates are presented. (d) Visual acuities of the mice were measured as described in Methods. Numbers of samples analyzed are shown in the graphs (data from 4 independent litters). P-values were calculated using one-sided Student's t-test (\*  $p < 0.05$ ; \*\*  $p < 0.01$ ; \*\*\*  $p < 0.005$ ).

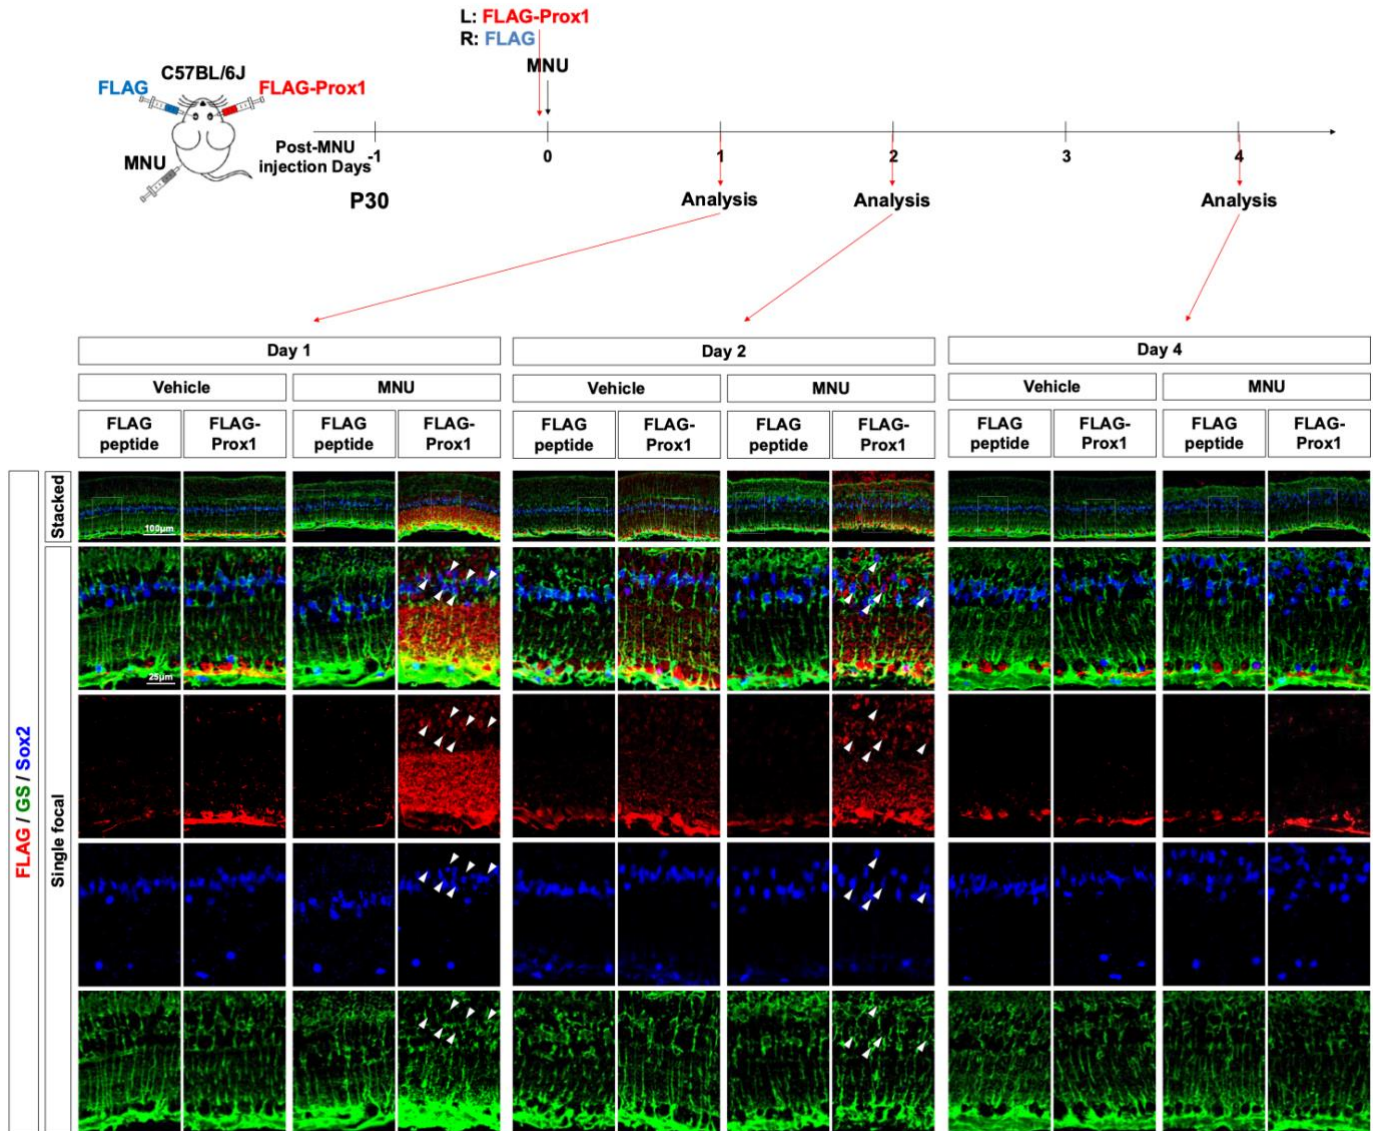

**Supplementary Figure 6. Delivery of Prox1 protein to the injured mouse retina.** Equal volumes (1  $\mu$ l) of FLAG peptide (10 ng/ $\mu$ l in PBS; administered to left eyes) and recombinant FLAG-Prox1 protein (20 ng/ $\mu$ l in PBS; administered to right eyes) were injected into the intravitreal spaces of P30 mouse eyes. L, left eyes; R, right eyes. This injection occurred 1 hour after intraperitoneal administration of vehicle (PBS containing 0.05% acetic acid) or MNU (60 mg/kg). The mouse eyes were collected at 1 day (Day 1; P31), 2 days (Day 2; P32), or 4 days (Day 4; P34) post-protein injection, and the presence of the injected FLAG-Prox1 proteins in the mouse retinas was evaluated by immunostaining using an anti-FLAG antibody (red). Penetration of the proteins into MG cells was identified through co-immunostaining with the anti-FLAG antibody and antibodies against MG cell markers, GS and Sox2. Arrowheads point FLAG-positive;Sox2-positive MG nuclei.



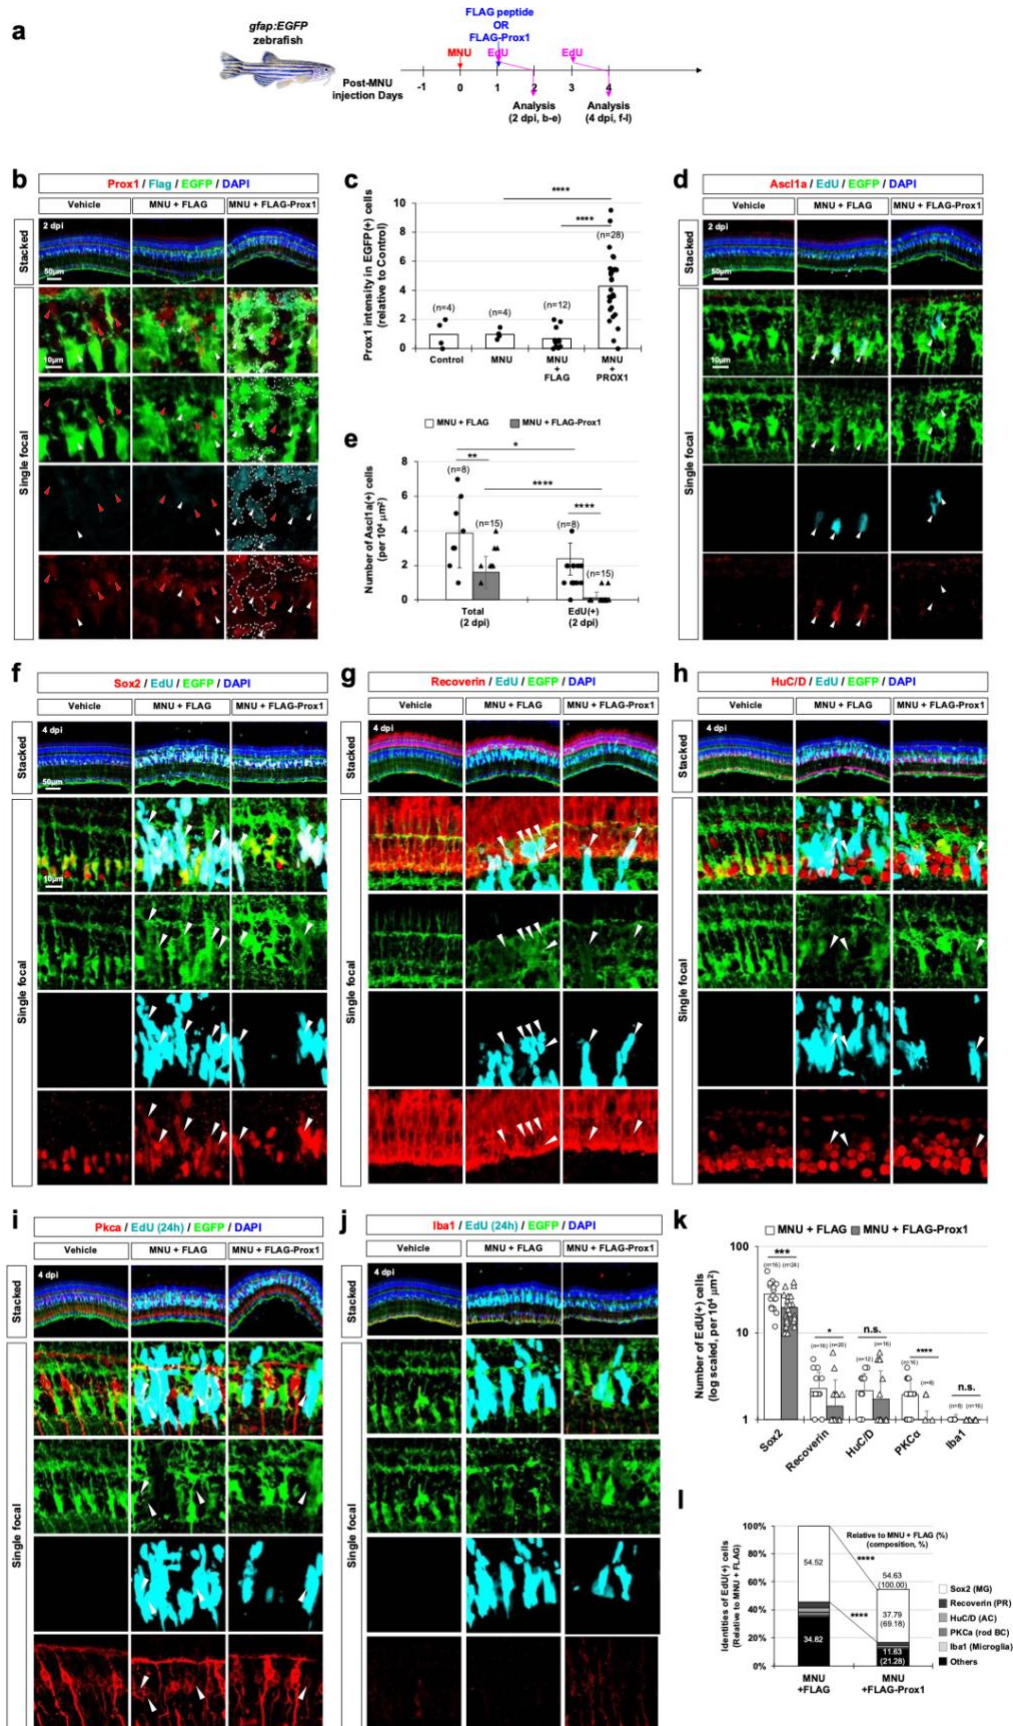



**Supplementary Figure 7. Exogenous Prox1 suppresses MG proliferation in the injured zebrafish retina.**

**(a)** FLAG peptides or recombinant FLAG-Prox1 proteins were injected into the intravitreal space of MNU-injured *gfap-EGFP* zebrafish eyes, and proliferating cells were labeled with EdU as it is indicated. **(b)** Prox1 distribution in the zebrafish retinas was examined by immunostaining with a rabbit anti-Prox1 antibody, and FLAG-Prox1 was detected by immunostaining with a mouse anti-FLAG antibody. White arrowheads indicate Prox1 in EGFP-positive MG, while red arrowheads point Prox1 in EGFP-negative retinal cells. The FLAG immunostaining signals are outlined by dotted lines. **(c)** The graph illustrates Prox1 intensity in MG relative to other retinal neurons within the same image. **(d)** MGPC identities of EdU-labeled cells in the retinas were determined by co-staining with the cell type-specific marker, *Ascl1*. White arrowheads point *Ascl1*;EdU-positive cells. **(e)** The number of *Ascl1*-positive cells in the zebrafish retinas is presented. **(f – j)** Additionally, the identities of EdU-labeled newborn cells in the zebrafish retinas were determined by co-staining with retinal cell type-specific markers, including Sox2 for MG or MGPCs (f); Recoverin for PR (g); HuC/D for AC (h); *Pkcx* for BC (i); and *Iba1* for microglia (j). Arrowheads indicate EdU-labeled marker-positive cells. **(k)** The number of EdU-labeled cells expressing the markers are shown in the graph. **(l)** Cell composition of EdU-labeled cells in MNU-injured fish retinas is depicted in the graph. For MNU+FLAG-Prox1 samples, the values the relative to the numbers of cells in MNU+FLAG samples are presented, together with cell composition in the retina in the brackets. Others represent EdU(+) cells, which do not express the listed markers, could include retinal cells, including cone photoreceptors and cone BCs, and non-retinal origins, astrocytes and endothelial cells. Numbers of samples analyzed are shown in the graphs (data from 3 independent litters). P-values were calculated using one-sided Student's t-test (\* $p < 0.05$ ; \*\*  $p < 0.01$ ; \*\*\*  $p < 0.005$ ; \*\*\*\*,  $p < 0.001$ ).

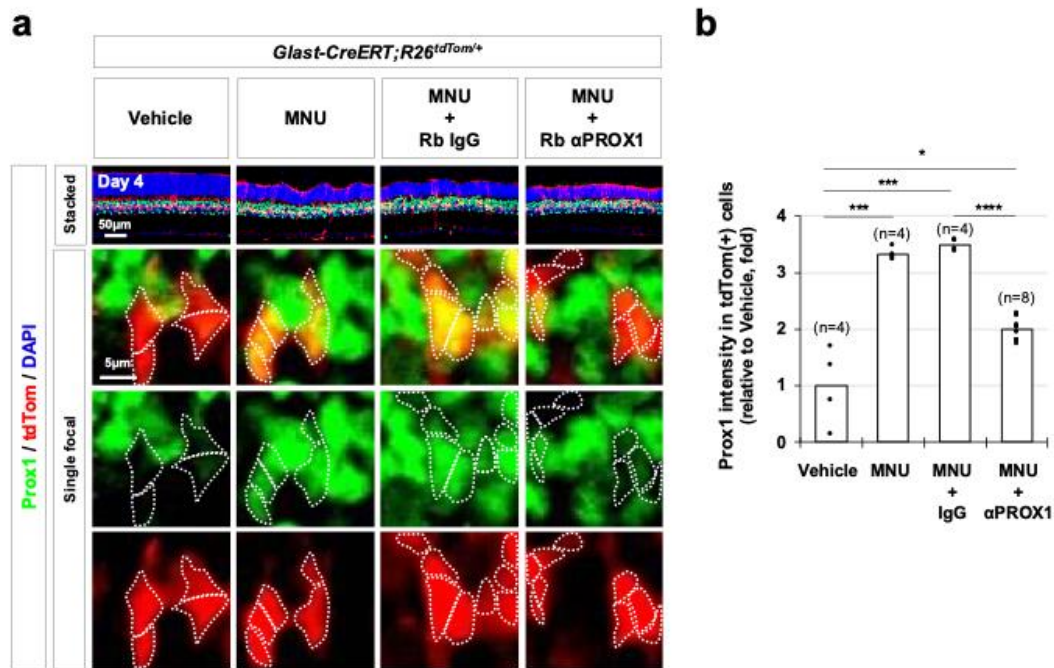

**Supplementary Figure 8. Decrease of Prox1 in MG of MNU-injured mouse retinas by intravitreal injection of anti-Prox1 antibody.** (a) Tam was injected into the peritoneal space of *Glast-CreERT;R26<sup>tdTom/+</sup>* mice at P14 to activate CreER in MG in the mouse retinas. MNU was injected into the peritoneal space of the mice at P30 to degenerate PRs in the retinas. Concomitantly, rabbit immunoglobulin G<sub>1</sub> (Rb IgG) or rabbit anti-Prox1 polyclonal antibody (Rb αProx1) was injected to the intravitreal space of the MNU-injected mice. The eye sections were prepared from the mice at 4 days after the MNU injury. Distribution of Prox1 in the mouse retinal sections was visualized by immunostaining. The activation of CreERT in MG was determined by detecting Cre reporter tdTom. Nuclei of retinal cells in the sections were visualized by DAPI staining. tdTom-positive MG cell bodies are outlined by dotted lines. (b) Prox1 intensities of the tdTom(+) MG cells relative to those in Vehicle-injected control retina are plotted. Numbers of samples analyzed are shown in the graph (data from 3 independent litters). P-values were calculated using one-sided Student's t-test (\*p < 0.05; \*\* p < 0.01; \*\*\* p < 0.005; \*\*\*\*, p < 0.001). \*, p<0.05; \*\*\*\*, p<0.001; n.s., not significant).

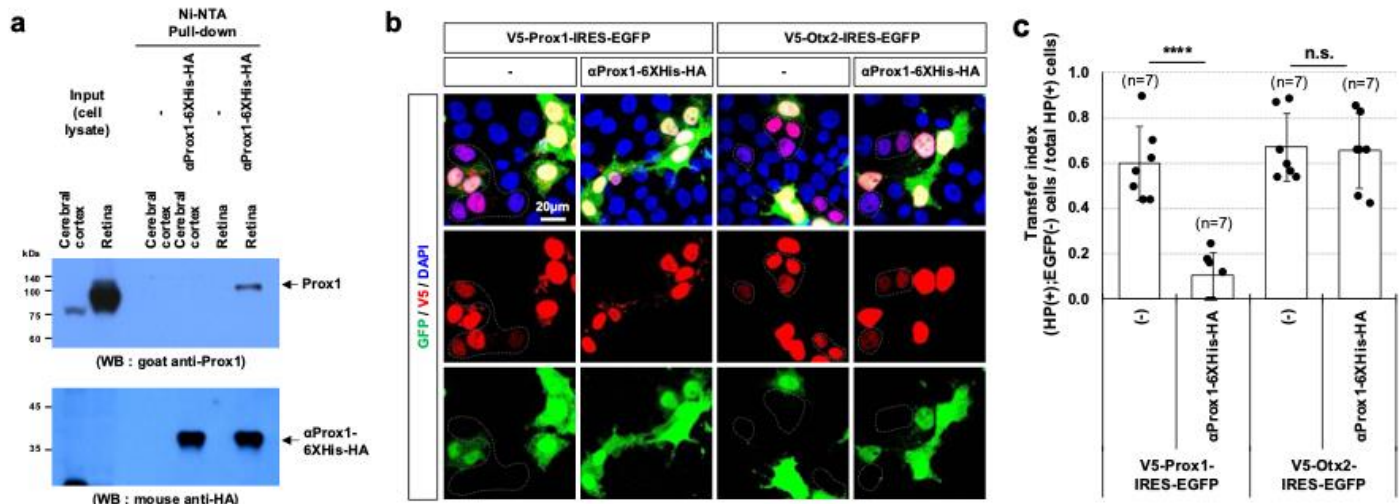

**Supplementary Figure 9. Identification of the neutralizing activity of  $\alpha$ Prox1 towards intercellular Prox1 transfer.** (a) The cDNA of anti-Prox1 single-chain variable fragment ( $\alpha$ Prox1) was cloned into the M13 phagemid to express  $\alpha$ Prox1-6His-HA in *Escherichia coli* (*E. coli*), and the protein was purified using a Ni-NTA column, which captured its 6His tag of the antibody protein (see details in Methods). The  $\alpha$ Prox1-6His-HA protein (1  $\mu$ g) was added to cell lysates (containing 1 mg protein) from the adult mouse cerebral cortex or retina and pulled down using the Ni-NTA column. Prox1, bound and co-purified with  $\alpha$ Prox1-6His-HA, was then detected by Western blot (WB) with goat anti-Prox1 antibody. The  $\alpha$ Prox1-6His-HA proteins in each lane were also detected by WB with mouse anti-HA antibody. (b) The  $\alpha$ Prox1-6His-HA protein was added to the growth medium of HeLa cells (25  $\mu$ g/ml), which were transfected with pCAGIG-V5-Prox1 or pCAGIG-V5-Otx2. The cells expressing V5-Prox1 or V5-Otx2 with or without co-transcribed EGFP were identified by co-immunostaining with mouse anti-V5 and chicken anti-GFP antibodies. The cells surrounded by dotted lines contain the homeoproteins (HPs; i.e., Prox1 and Otx2) without EGFP, suggesting that they received the HP from HP;EGFP double-positive neighboring cells. (c) The transfer index, which is the ratio of HP(+);EGFP(-) cells among total HP(+) cells, is depicted in the graph. Numbers of samples analyzed are shown in the graph (data from 6 independent experimental batches). P-values were calculated using one-sided Student's t-test (n.s., not significant; \*\*\*\*  $p < 0.001$ ).



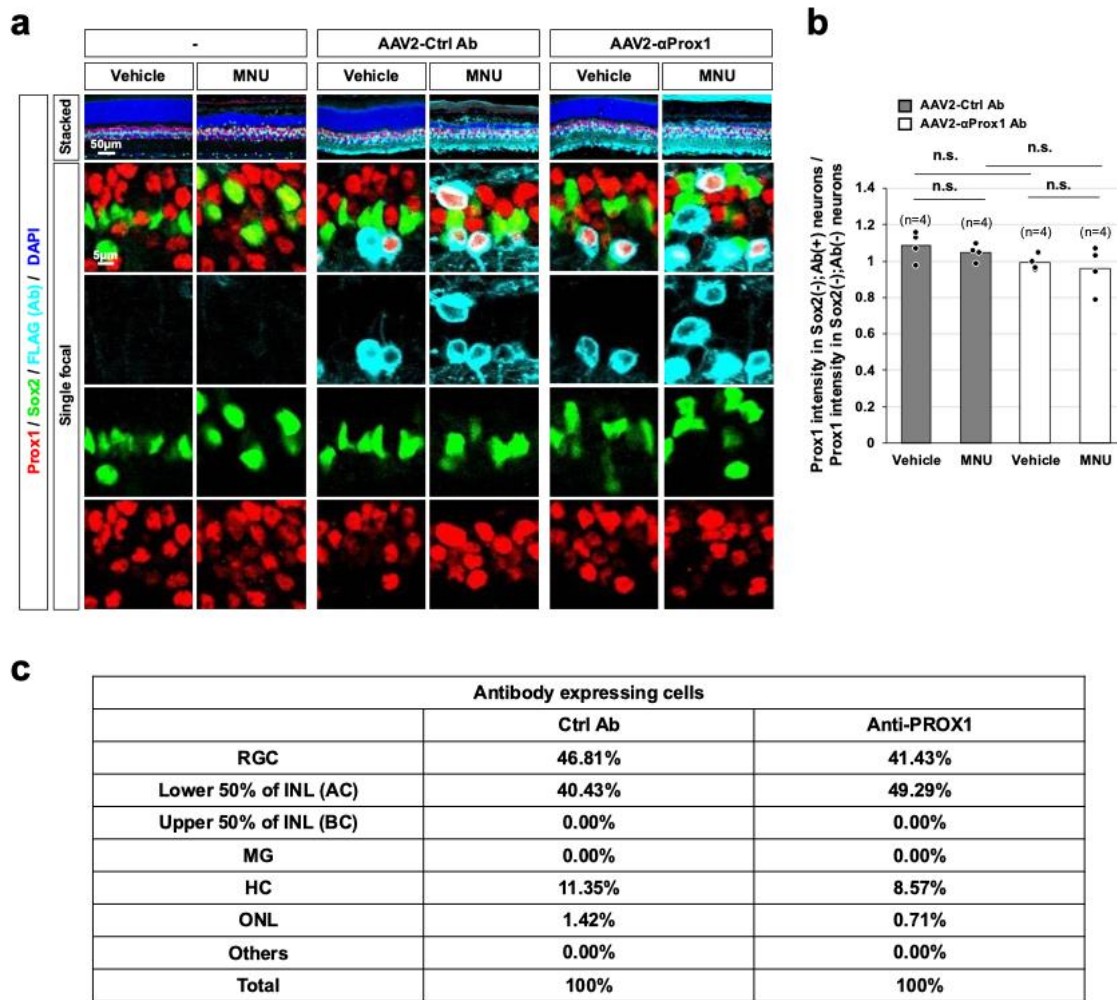

**Supplementary Figure 10. Identification of AAV-infected retinal cell populations.** (a) P30 C57BL/6J mice were intravitreally injected with AAV2-Ctrl Ab or AAV2-aProx1. At 14 days post-infection, the mice were treated with MNU, and retinal samples were collected 4 days post-injection. AAV-infected cells were identified by immunostaining for the FLAG-tagged antibodies. (b) Changes in Prox1 levels in FLAG-positive retinal neurons were quantified and are presented in the graph. (c) The retinal composition of FLAG-tagged antibody-expressing cells is summarized in the table. Numbers of samples analyzed are shown in the graph (data from 6 independent experimental batches). P-values were calculated using one-sided Student's t-test (n.s., not significant).

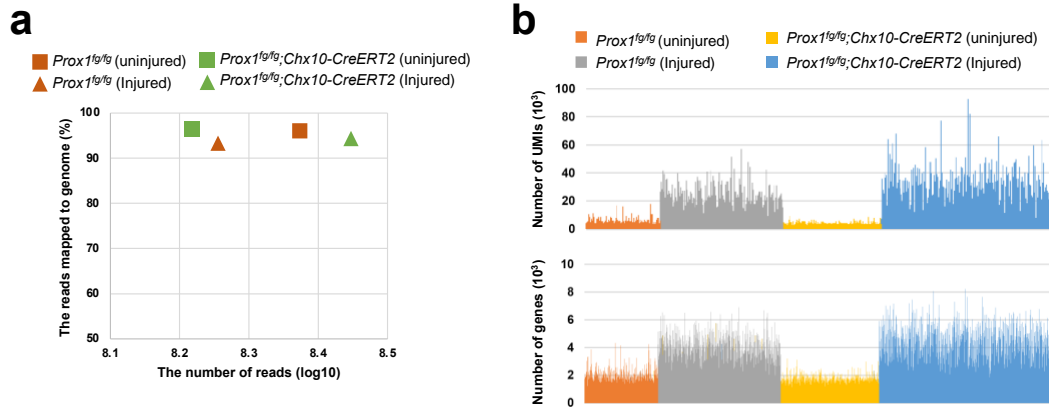

**Supplementary Figure 11. Quality of single-cell RNA-seq data.** (a) Average number of reads from mouse retina cells with the indicated genotypes and those mapped to genome are presented in the graph. (b) Unique molecular identifiers (UMIs) and number of genes in each cell are depicted in the graphs.

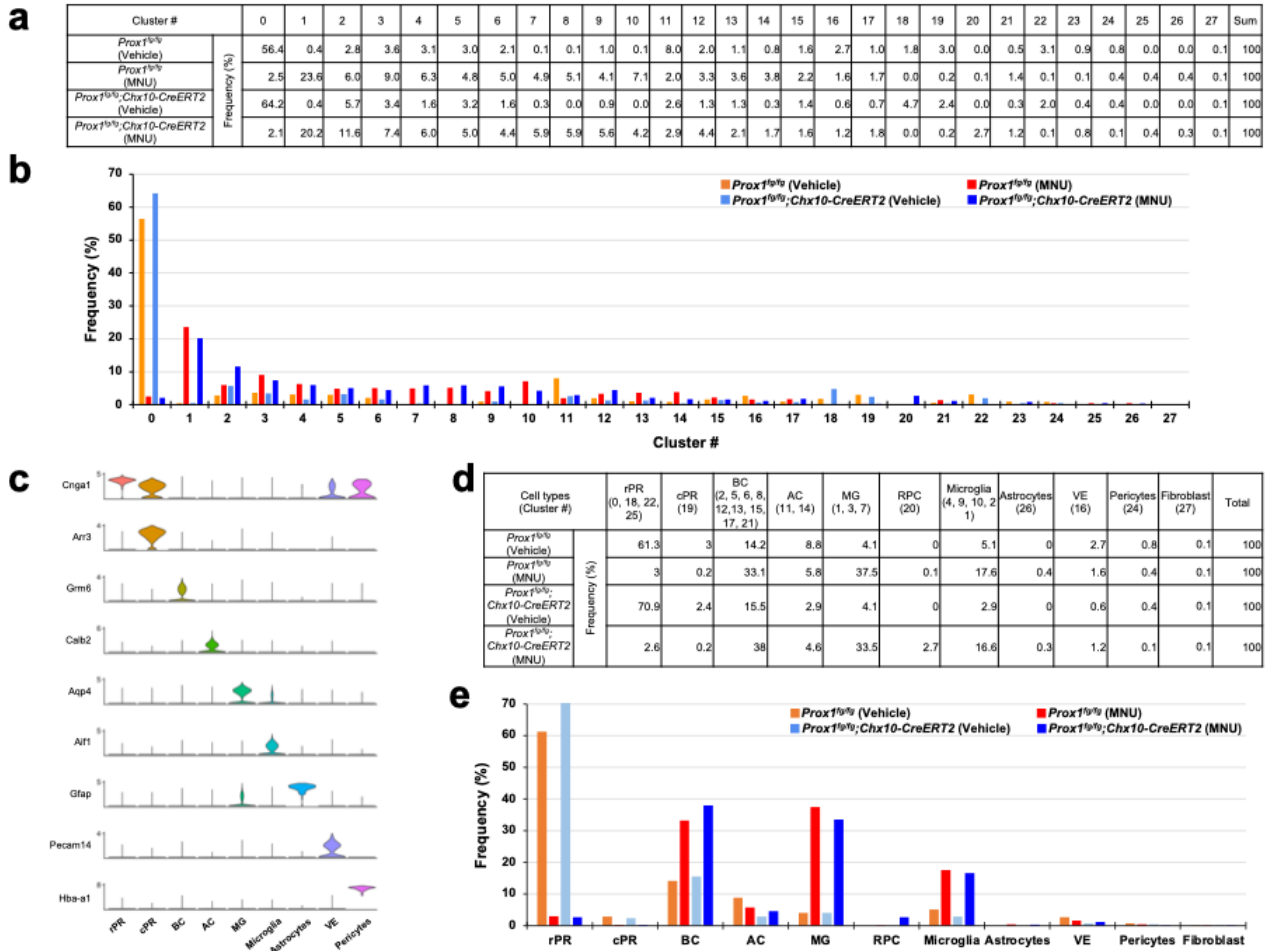

### Supplementary Figure 12. scRNA-seq analysis of the cells in MNU-injured mouse retinas.

(a, b) Frequency of each cluster in the mouse retinal cell population. (c) Violin plots of the expression of cell type-specific markers identified in previous studies. The cell type of each cluster was defined by these cell type-specific markers. (d, e) Frequency of each cell type in the mouse retinal cell population.



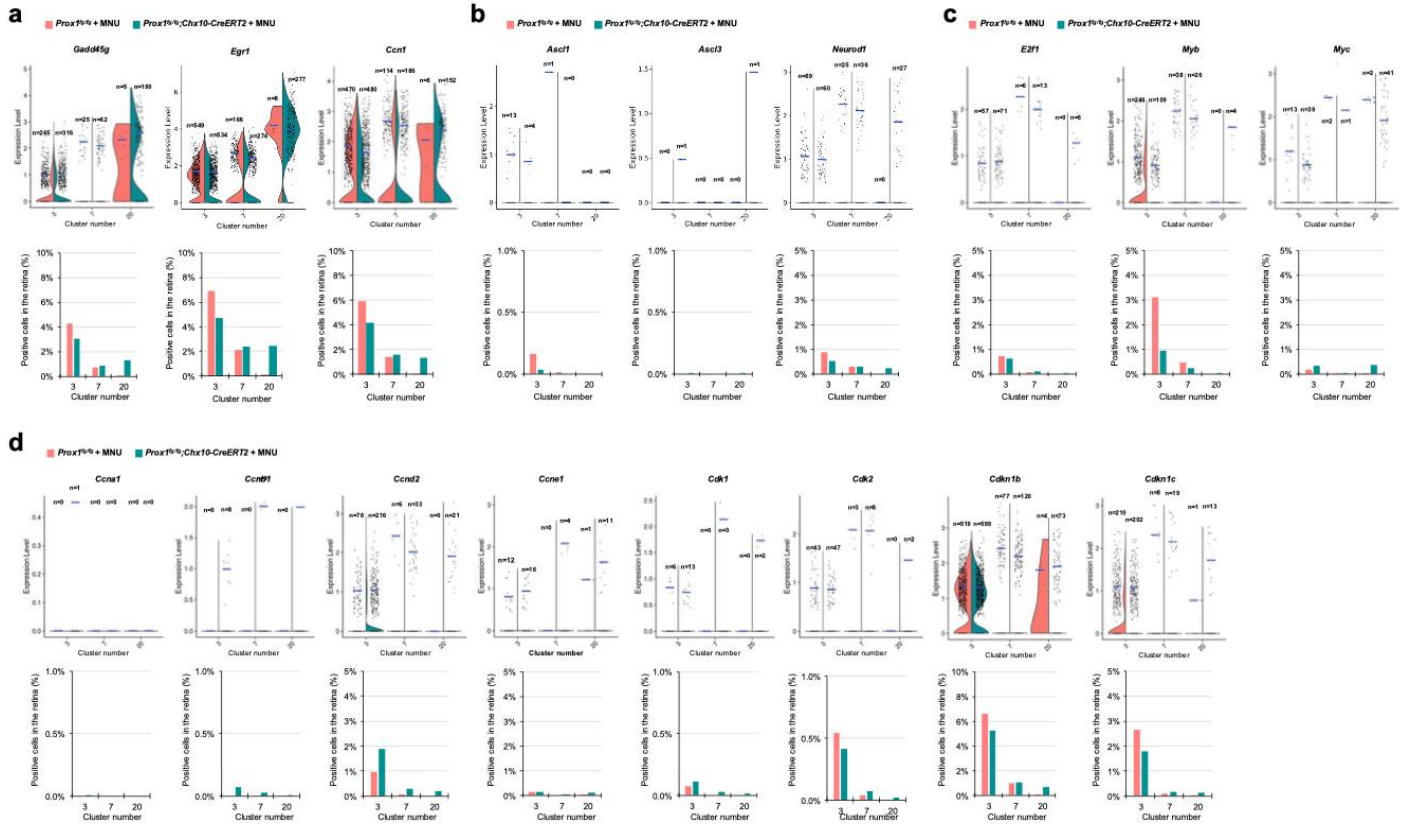

**Supplementary Figure 13. Expression of cell cycle regulatory genes in cluster #20.** (a) Violin plots of the cells expressing mRNA of the RPC marker, *Gadd45g*; the target of Hbegf signaling, *Egr1*; and the target of Yap/Taz transcription activators, *Ccn1*, in MG (#3 and #7) and MGPC (#20) populations. (b) Violin plots of the cells expressing proneural transcription factor *Ascl1*, *Ascl3*, and *Neurod1* mRNA. (c) Violin plots of the cells expressing *E2f1*, *Myb*, and *Myc* mRNA. (d) Violin plots of the cells expressing Cyclin (*Ccna1*, *Ccnb1*, *Ccnd2*, and *Ccne1*), Cdk (*Cdk1* and *Cdk2*), and Cdk inhibitor (*Cdkn1b* and *Cdkn1c*) mRNA. Each dot represents the expression level of the corresponding gene in a cell. Blue horizontal bars indicate the mean expression. Graphs in the bottom of the plots show the percentage of the mRNA-expressing cells in total retinal cells. Numbers in the violin plots represent the cells expressing the corresponding genes.

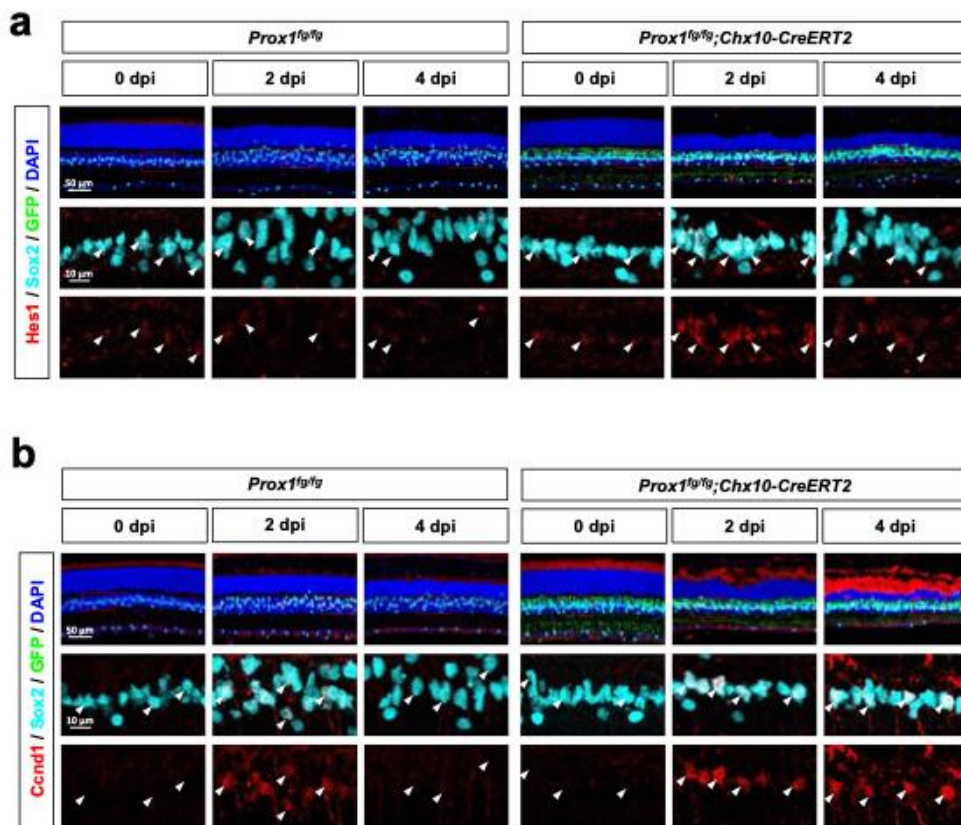

**Supplementary Figure 14. Injury-induced expression of Hes1 and Ccnd1 in MGPCs of *Prox1<sup>tg/tg</sup>;Chx10-CreERT2* mouse retinas.** (a) Expression of Hes1 in Sox2-positive MG or MGPCs in the injured *Prox1<sup>tg/tg</sup>* and *Prox1<sup>tg/tg</sup>;Chx10-CreERT2* mouse retinas was investigated by immunostaining. (b) Expression of Ccnd1 in Sox2-positive MG or MGPCs in the injured *Prox1<sup>tg/tg</sup>* and *Prox1<sup>tg/tg</sup>;Chx10-CreERT2* mouse retinas was investigated by immunostaining. Arrowheads indicate Sox2-positive MG or MGPC nuclei.

**a**

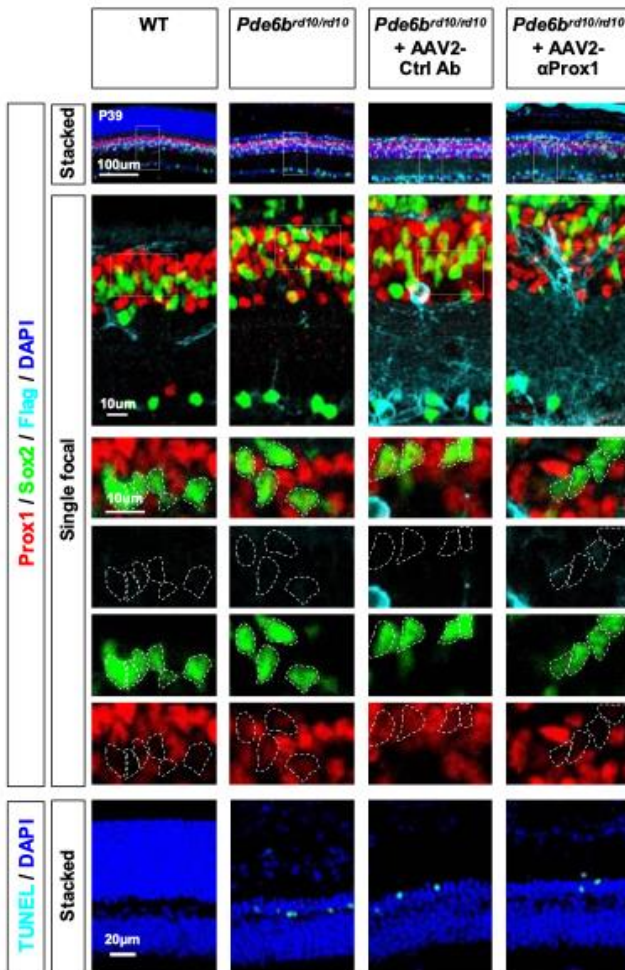

**b**

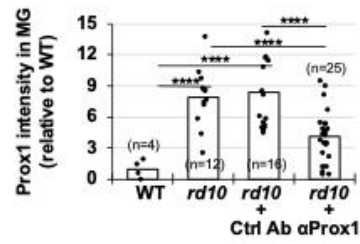

**c**

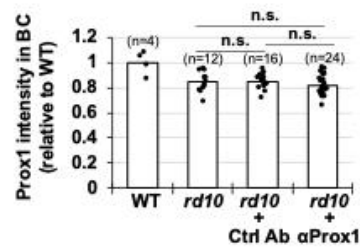

**d**

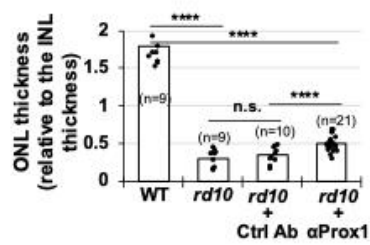

**e**

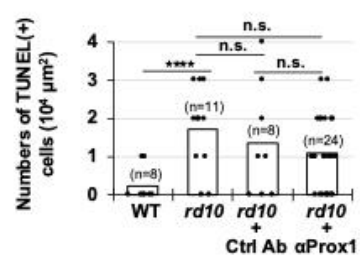

**f**

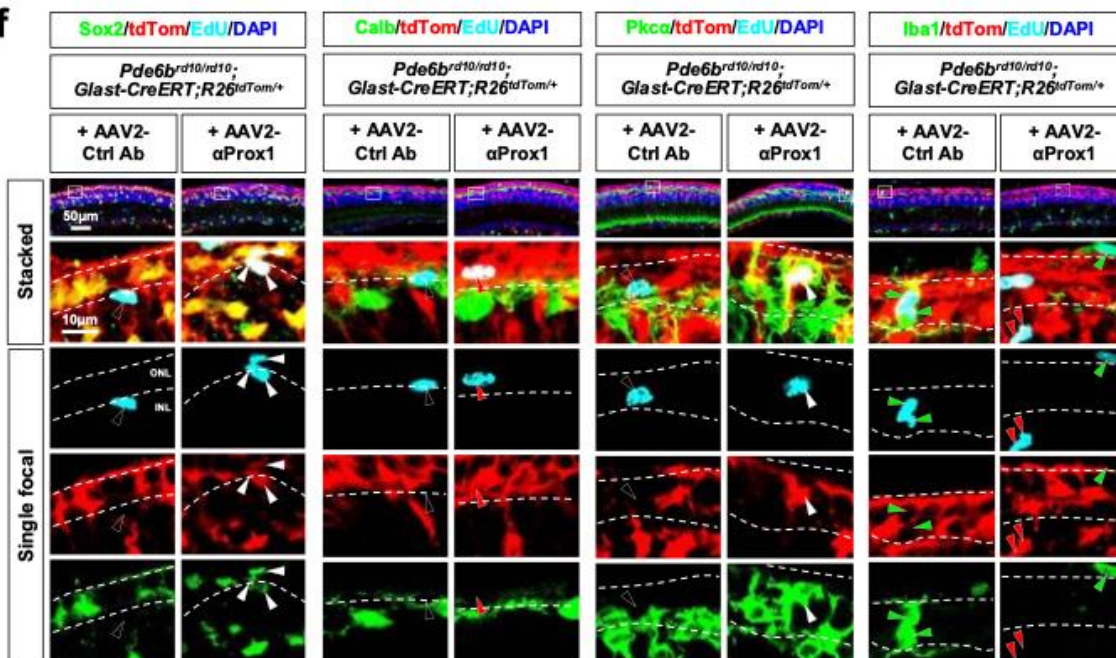



**Supplementary Figure 15. Regeneration of retinal neurons from MG in *Pde6b*<sup>rd10/rd10</sup> mice expressing  $\alpha$ Prox1.** (a) *Pde6b*<sup>rd10/rd10</sup> mice were intravitreally injected with AAV2 encoding FLAG-tagged control antibody (Ctrl Ab) or  $\alpha$ Prox1, as shown in Fig. 7f. The expression of the antibodies in the mouse retinas was identified by immunostaining with mouse anti-FLAG antibody. Prox1 expression in Sox2-positive MG or MGPCs (outlined by dotted lines) were also examined by co-immunostaining with rabbit anti-Prox1 and goat anti-Sox2 antibodies. The apoptotic cells in the sections were identified by TUNEL staining. (b and c) Prox1 intensity in MG/MGPCs (b) or BCs (c) relative to those of *Pde6b*<sup>rd10/rd10</sup> WT littermate mice are presented in the graphs. (d) The thicknesses of the ONL and INL of the retinal sections were measured and relative thickness of the ONL compared to the INL of the same retinal sections is presented in the graph. (e) The number of TUNEL(+) apoptotic cells per retinal area is presented in the graph. Numbers of samples analyzed are shown in the graphs (data from 3 independent litters). P-values were calculated using one-sided Student's t-test (\*\*\*\*,  $p < 0.001$ ; n.s., not significant). (f) Identities of EdU-labeled cells in the AAV-injected *Pde6b*<sup>rd10/rd10</sup> mouse retinas were investigated by immunostaining for Sox2 (MG), Calb (HC), Pkca (BC), and Iba1 (Microglia). MG origin of the cells was determined by the expression of tdTom Cre reporter. White arrowheads, EdU-positive cells co-expressing tdTom and the markers; red arrowheads, EdU-labeled cells containing tdTom but lacking of the markers; green arrowheads, EdU-labeled cells containing the markers but lacking of tdTom; black arrowheads, EdU-labeled cells lacking of tdTom and EdU. Numbers of EdU-positive cells expressing tdTom and corresponding markers are shown in Fig. 7h.

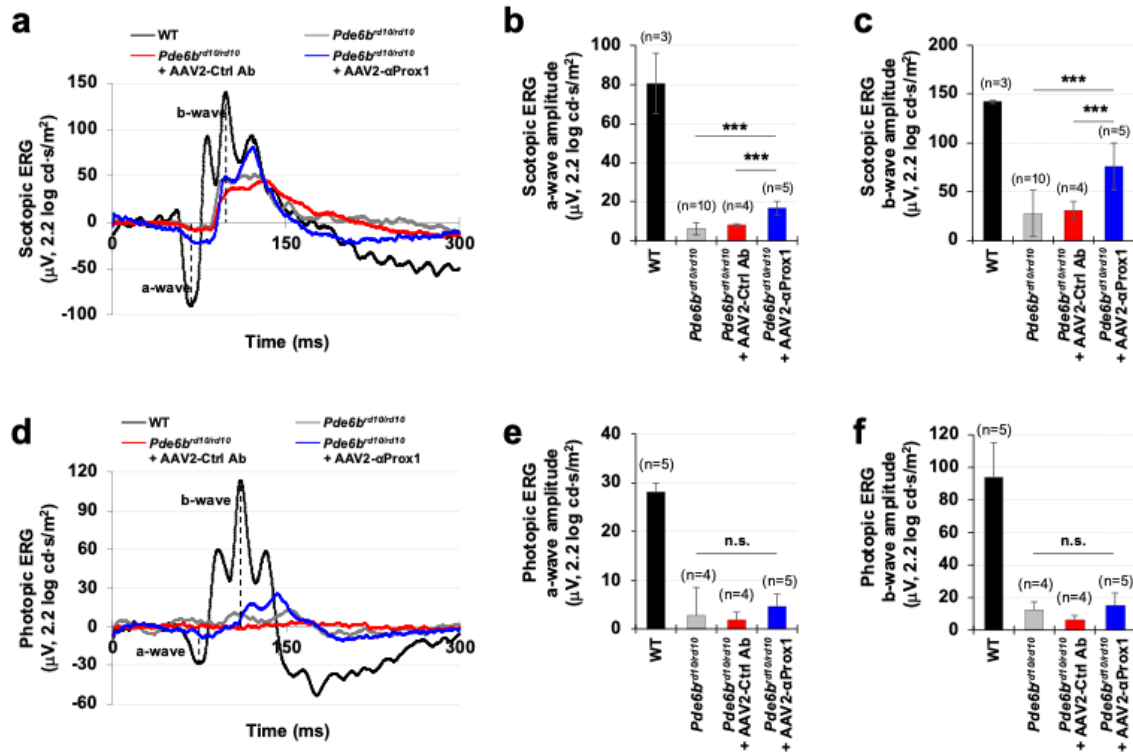

**Supplementary Figure 16. Recovery of photoreceptor activity in *Pde6b<sup>rd10/rd10</sup>* mice expressing αProx1.** (a and d) Scotopic and photopic ERG histograms of *Pde6b<sup>rd10/rd10</sup>* mice infected with the indicated AAV2 were measured at P35 (see details in Methods). Amplitudes of ERG a-waves (b and e) and b-waves (c and f) in the mouse retina. Error bars in the graphs denote SEM. Numbers of samples analyzed are shown in the graphs (data from 4 independent litters). P-values were calculated using one-sided Student's t-test (\*\*\*,  $p < 0.001$ ; n.s., not significant).

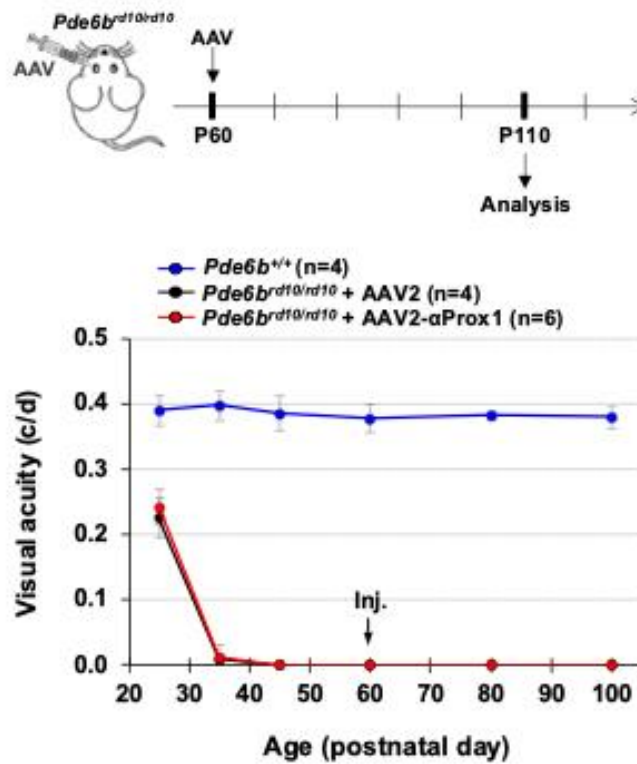

**Supplementary Figure 17. AAV2- $\alpha$ Prox1 injection was not affected to late-stage RP model mice.**  $Pde6b^{rd10/rd10}$  mice received intravitreal injections (Inj.) of AAV2 or AAV2- $\alpha$ Prox1 ( $5 \times 10^9$  vg/eye) at P60, when they have already lost their vision completely. Visual acuities of the injected mice were measured by Optomotry.

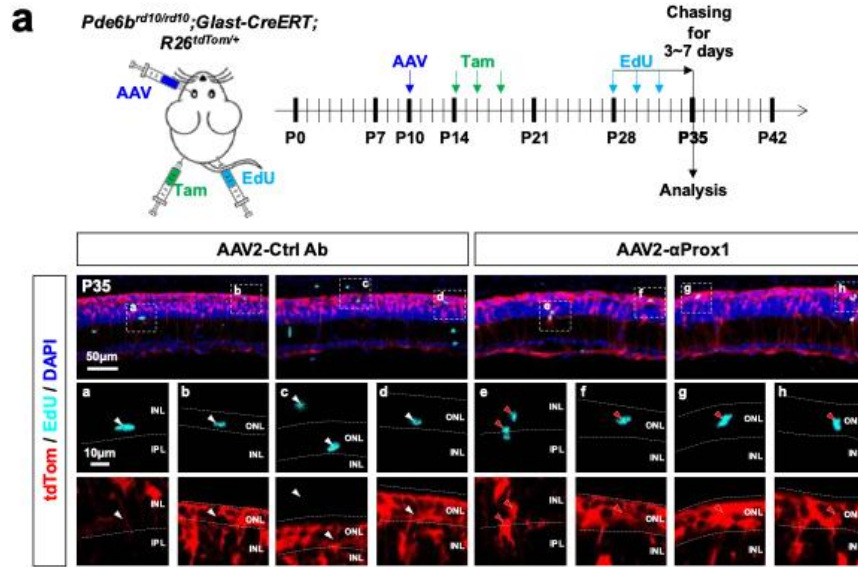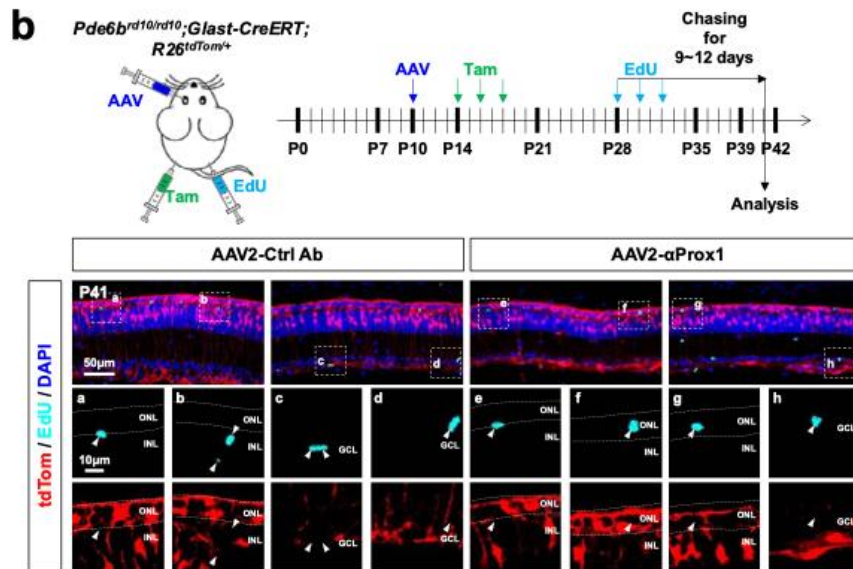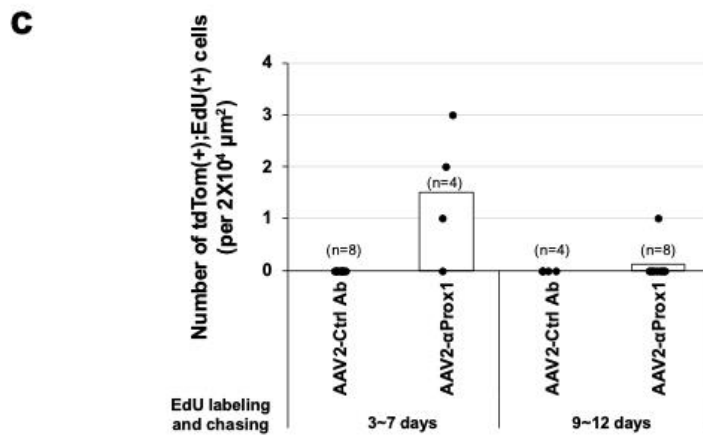



**Supplementary Figure 18. Lifespan of newborn photoreceptors in *Pde6b*<sup>rd10/rd10</sup> mouse retinas.** (a and b) *Pde6b*<sup>rd10/rd10</sup>;*Glast-CreERT*;*R26*<sup>tdTom/+</sup> mice were intravitreally injected with AAV2 encoding FLAG-tagged Ctrl Ab or  $\alpha$ Prox1. The mice were repeatedly injected with Tam to activate CreERT in MG and EdU to labeled newborn cells in the retina as it is indicated. The mouse eyes were then isolated for the immunostaining of EdU-labeled cells in the retinal sections. MG origin of EdU-labeled cells was determined by the expression of tdTom Cre reporter. (c) Numbers of EdU-labeled cells remained by 3-7 days (a) or 9-12 days (b) in *Pde6b*<sup>rd10/rd10</sup> mouse retinas are presented in the graph (data from 3 independent litters).

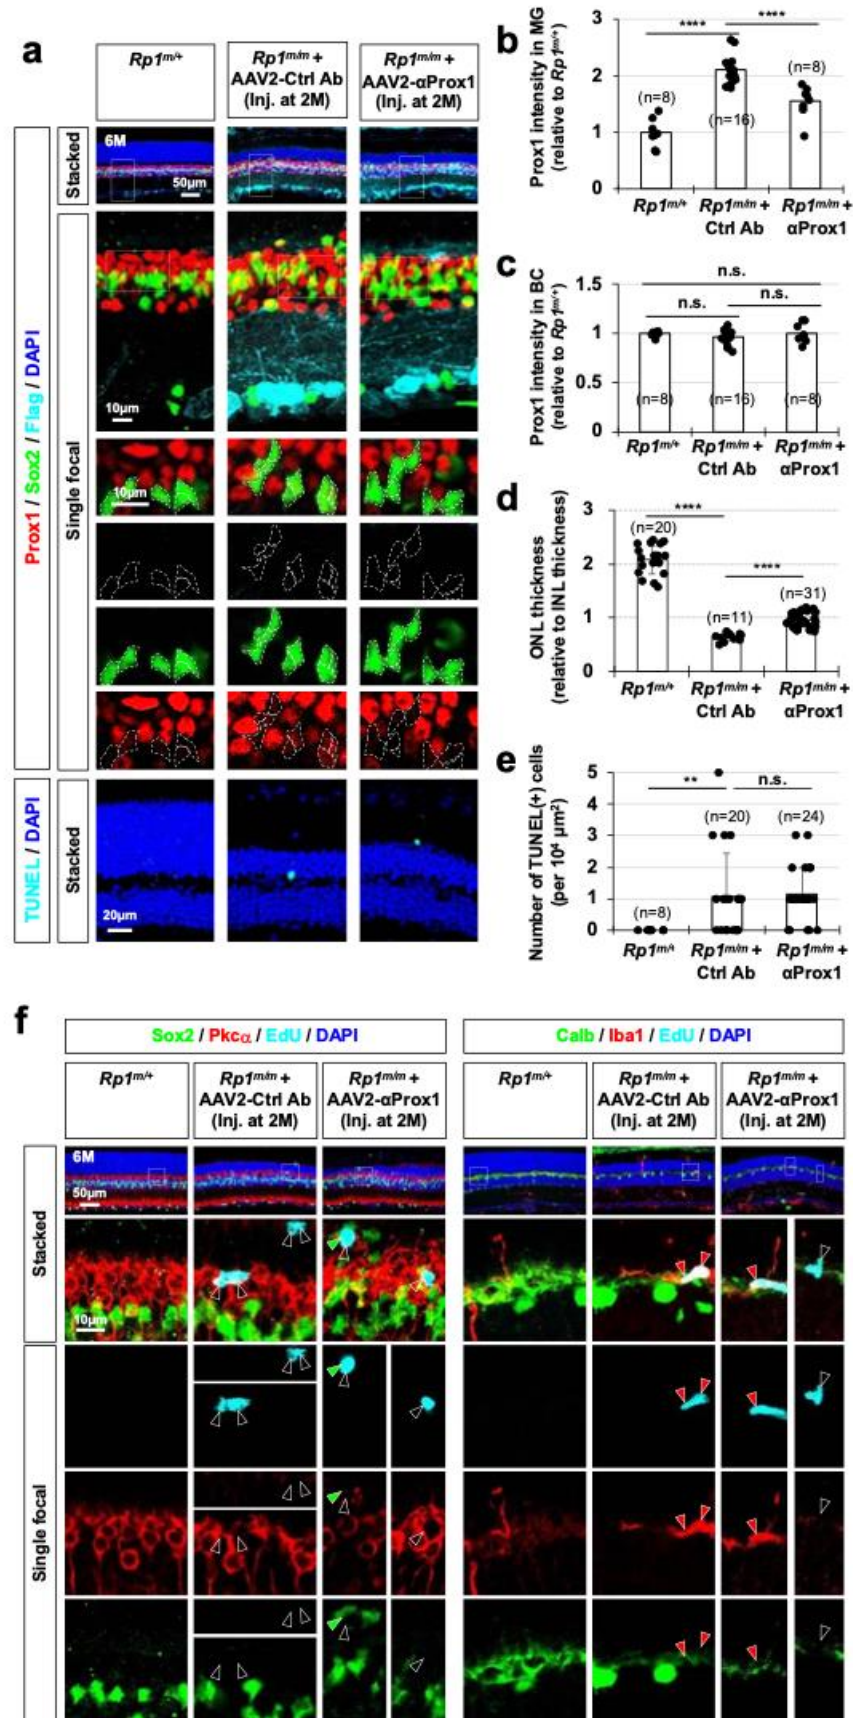

**Supplementary Figure 19. Regeneration of retinal neurons in *Rp1<sup>m/m</sup>* mice expressing  $\alpha$ Prox1.** (a) *Rp1<sup>m/m</sup>* mice were intravitreally injected with AAV2 encoding FLAG-tagged Ctrl Ab or  $\alpha$ Prox1 at 2M. The expression of the antibodies in the mouse retinas was then identified at 6M by immunostaining with mouse anti-FLAG antibody. Prox1 expression in Sox2-positive MG or MGPC (surrounded by dotted circles) were examined by co-immunostaining with rabbit anti-Prox1 and goat anti-Sox2 antibodies. The apoptotic cells in the sections were identified by TUNEL staining. (b and c) Prox1 intensity in MG/MGPCs (b) or BCs (c) relative to those of *Rp1<sup>m/+</sup>* littermate mice are presented in the graphs (data from 2 independent litters). (d) The thicknesses of the ONL and INL of the retinal sections were measured and relative thickness of the ONL compared to the INL of the same retinal sections is presented in the graph. (e) The number of TUNEL(+) apoptotic cells per retinal area is presented in the graph. (f) Identities of EdU-labeled cells in the AAV-injected *Rp1<sup>m/m</sup>* mouse retinas were investigated by immunostaining for Sox2 (MG or MGPC), Pkca (BC), Calb (HC), and Iba1 (microglia). Red and green arrowheads, EdU-labeled cells containing the markers in corresponding colors; black arrowheads, EdU-labeled cells lacking of the markers. Numbers of EdU-positive cells expressing corresponding markers are shown in Fig. 8f. Numbers of samples analyzed are shown in the graphs (data from 2 independent litters). P-values were calculated using one-sided Student's t-test (\*\*\*\*,  $p < 0.001$ ; \*\*,  $p < 0.01$ ; n.s., not significant).

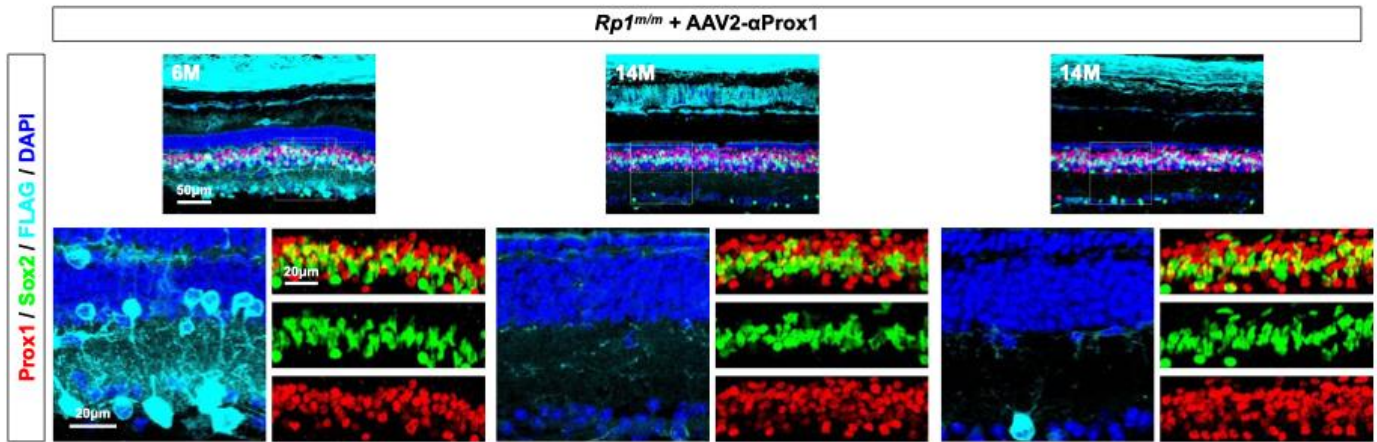

**Supplementary Figure 20. Loss of  $\alpha$ Prox1 expression in AAV2- $\alpha$ Prox1-infected  $Rp1^{m/m}$  mice.**  $Rp1^{m/m}$  mice (2 months-old) were intravitreally injected with AAV2- $\alpha$ Prox1 and the expression of  $\alpha$ Prox1 in the mouse retinas was assessed at 6 months (6M) or 14 months (14M) age of the mice by immunostaining for the FLAG tag of the antibody. Sox2-positive MG and Prox1-expressing cells in the mouse retinas were also identified by co-immunostaining of the retinal sections.



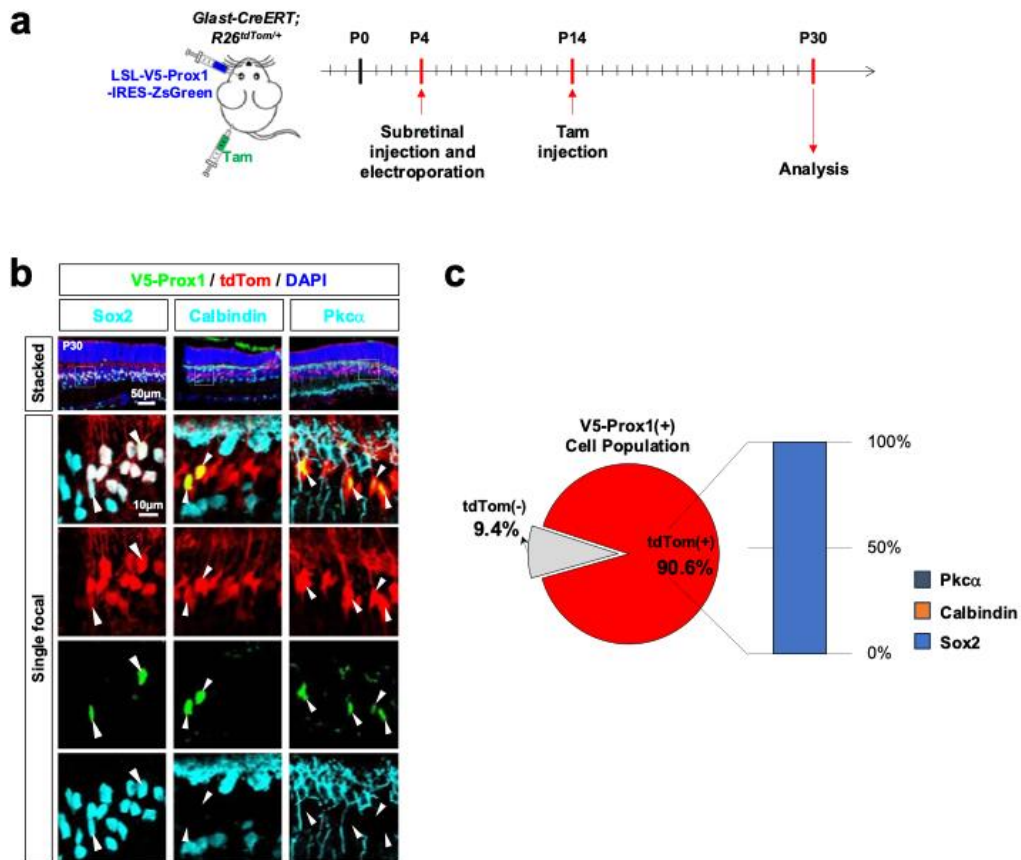

**Supplementary Figure 21. Prox1 overexpression in MG does not induce fate conversion to retinal neurons.** **(a)** Plasmid DNA (2.5  $\mu$ g, 0.5  $\mu$ L) encoding LSL-V5-Prox1-IRES-ZsGreen was injected into the subretinal space of P4 *Glast-CreERT;R26<sup>tdTom/+</sup>* mice. Tam was administered to activate CreERT, which excised the LSL cassette in the *R26<sup>tdTom</sup>* locus, leading to tdTom expression in MG. Simultaneously, Cre-mediated excision of the LSL sequence in the plasmid enabled the expression of V5-Prox1 and ZsGreen in transfected MG. **(b)** At P30, the identity of V5-Prox1 and ZsGreen co-expressing cells was assessed by immunostaining for cell type-specific markers: Sox2 (MG marker), Calbindin (HC and an AC subset), and Pkca (rod BC marker). **(c)** The composition of V5-Prox1-positive cells in the mouse retina is summarized in the accompanying graph.

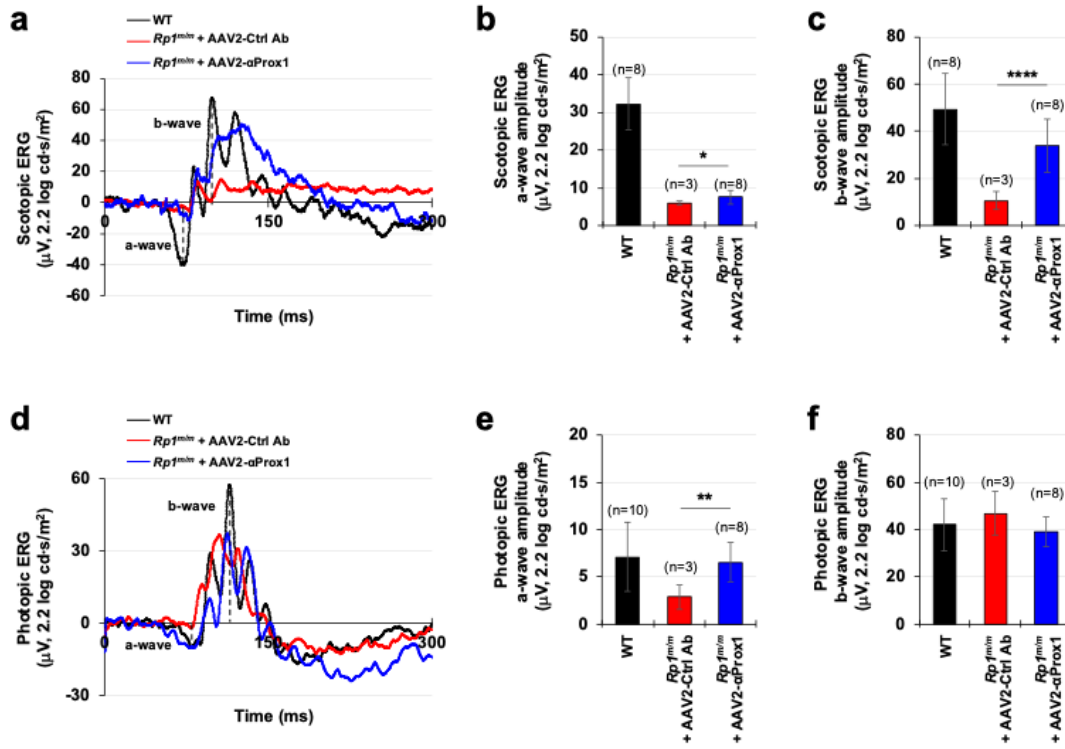

**Supplementary Figure 22. Recovery of photoreceptor activity in RP model mice expressing  $\alpha$ Prox1.** (a and d) Scotopic and photopic ERG histograms of 6 months-old  $Rp1^{m/m}$  mice infected with the indicated AAV2 were measured. Amplitudes of ERG a-waves (b and e) and b-waves (c and f) in the mouse retina. Error bars in the graphs denote SEM. Numbers of samples analyzed are shown in the graph (data from 2 independent litters). P-values were calculated using one-sided Student's t-test (\*  $p < 0.05$ ; \*\*  $p < 0.01$ ).

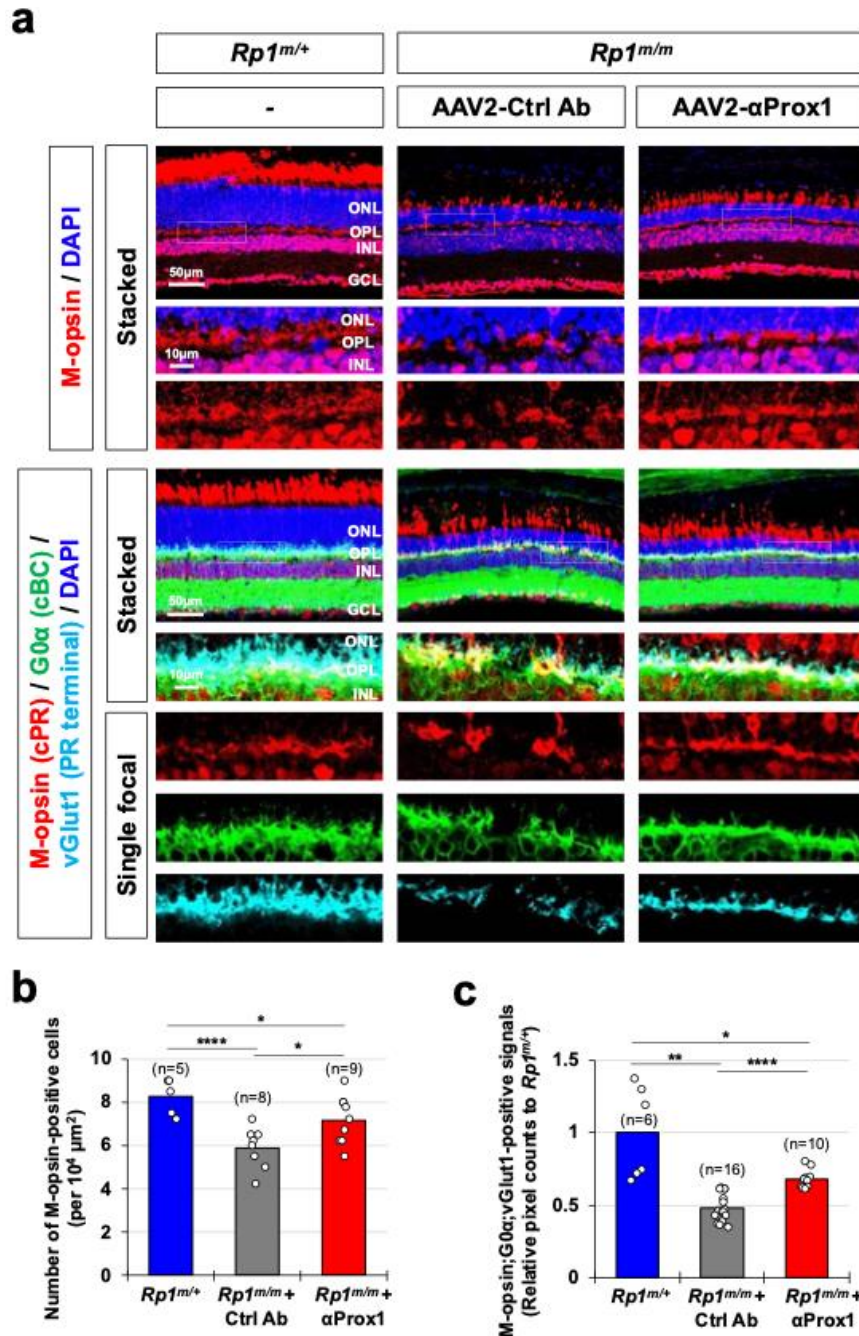

**Supplementary Figure 23. Preservation of cone photoreceptors in *Rp1<sup>m/m</sup>* mice expressing  $\alpha$ Prox1.** (a) *Rp1<sup>m/m</sup>* mice were intravitreally injected with AAV2 encoding FLAG-tagged Ctrl Ab or  $\alpha$ Prox1, as shown in Fig. 8d Distribution of cPRs in the mouse retinas were examined by immunostaining of M-opsin. Synaptic terminals of the PRs and their post-synaptic targets, i.e., cone bipolar cells (cBCs), are visualized by co-immunostaining of respective markers, vGlut1 and G0 $\alpha$ . (b) Number of M-opsin-positive cPRs were counted and presented in the graph. (c) The pixel counts of M-opsin;G0 $\alpha$ ;vGlut1 co-stained signals were measured from the immunostaining images and depict in the graph. Numbers of samples analyzed are shown in the graph (data from 2 independent litters). P-values were calculated using one-sided Student's t-test (\*  $p<0.05$ ; \*\*  $p<0.01$ ; \*\*\*\*  $p<0.001$ ).

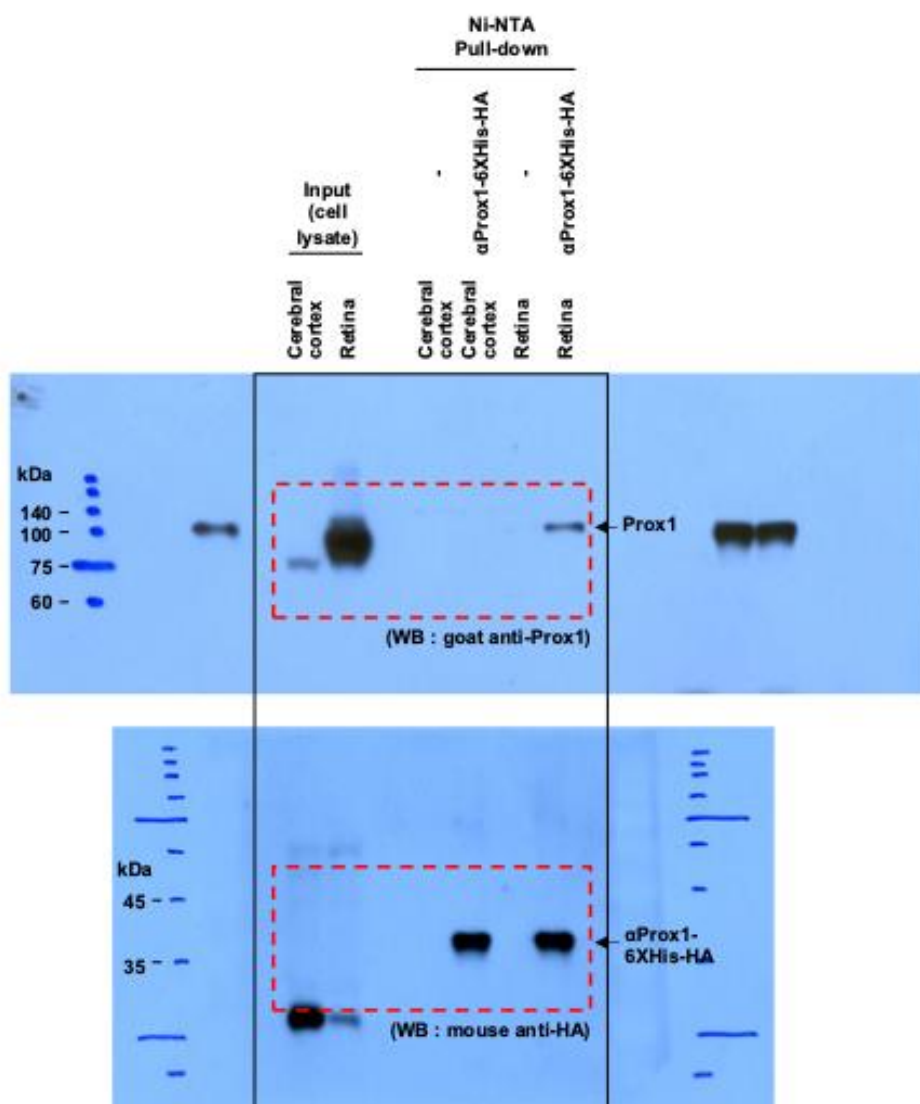

Supplementary Figure 24. Uncropped images of the blots used in Supplementary Figure 9A.



**Supplementary Table 1. List of materials and resources used in this study.**

| REAGENT or RESOURCE                                             | SOURCE                 | IDENTIFIER  |
|-----------------------------------------------------------------|------------------------|-------------|
| Antibodies [dilution for application]                           |                        |             |
| Rabbit polyclonal anti-Prox1 (applied to IHC [1:1,000] and IVT) | Merck Milipore         | ABN278      |
| Mouse monoclonal anti-Prox1 (applied to IHC [1:500])            | abcam                  | ab92825     |
| Goat polyclonal anti-Prox1 (applied to WB [1:50])               | R&D system             | AF2727      |
| Chicken polyclonal anti-GFP (IHC [1:2,000], WB [1:10,000])      | abcam                  | ab13970     |
| Goat polyclonal anti-Sox2 (IHC [1:100])                         | R&D system             | AF2018      |
| Rabbit polyclonal anti-Sox2 (IHC [1:200])                       | abcam                  | ab97959     |
| Rabbit polyclonal anti-Sox9 (IHC [1:200])                       | abcam                  | ab185230    |
| Mouse monoclonal anti-p27[Kip1] (IHC [1:100])                   | BD                     | 610242      |
| Rabbit polyclonal anti-Glutamate sythetase (IHC [1:200])        | Sigma                  | G2781       |
| Mouse monoclonal anti-Glutamate sythetase (GS-6) (IHC [1:200])  | Merck Milipore         | MAB302      |
| Rabbit polyclonal anti-Recoverin (IHC [1:200])                  | Chemicon               | AB5585      |
| Mouse monoclonal anti-Rhodopsin (1D4) (IHC [1:200])             | Millipore              | MAB5356     |
| Rabbit polyclonal anti-opsin (Red/Green) (IHC [1:200])          | Merck Millipore        | AB5405      |
| Goat polyclonal anti-Otx2 (IHC [1:200])                         | R&D system             | AF1979-SP   |
| Mouse monoclonal anti-Calbindin (D-28K) (IHC [1:200])           | Sigma                  | C9848       |
| Rabbit polyclonal anti-Calbindin (D-28K) (IHC [1:200])          | swant                  | CB38a       |
| Mouse monoclonal anti-Chx10 (E-12) (IHC [1:200])                | Santa Cruz             | sc-365519   |
| Rabbit polyclonal anti-PKC $\alpha$ (C-20) (IHC [1:200])        | Santa Cruz             | sc-208      |
| Mouse monoclonal anti-Goalpha (IHC [1:200])                     | Merck Milipore         | MAB3073     |
| Rabbit polyclonal anti-PAX6 (IHC [1:200])                       | Biolegend              | 901301      |
| Mouse monoclonal anti-HuC/HuD (16A11) (IHC [1:200])             | Thermo Scientific      | A-21271     |
| Rabbit polyclonal anti-Brn3a (IHC [1:100])                      | SYSY                   | 411003      |
| Mouse monoclonal anti-ASCL1 (D-7) (IHC [1:50])                  | Santa Cruz             | sc-374104   |
| Rabbit polyclonal anti-Iba1 (IHC [1:500])                       | Wako                   | 019-19741   |
| Guineapig polyclonal anti-Iba1 (IHC [1:500])                    | SYSY                   | 234 004     |
| Rabbit polyclonal anti-GFAP (IHC [1:200])                       | abcam                  | ab48050     |
| Mouse monoclonal anti-Cyclin D1 (HD11) (IHC [1:100])            | Santa Cruz             | sc-246      |
| Rabbit monoclonal anti-Hes1 (D6P2U) (IHC [1:20])                | Cell signaling         | 11988       |
| Guinea pig polyclonal anti-vGlut1 (IHC [1:200])                 | Sigma                  | AB5905      |
| Chicken polyclonal anti- $\beta$ -galactosidase (IHC [1:100])   | abcam                  | ab9361      |
| Mouse monoclonal anti-FLAG (M2) (IHC [1:50])                    | Sigma                  | F1804       |
| Mouse monoclonal anti-HA (16B12) (WB [1:1,000])                 | Biolegend              | 901513      |
| Normal Rabbit IgG                                               | Cell signaling         | 2729        |
| anti-PROX1 scFv-6XHis-HA (1A11)                                 | This paper             | N/A         |
| Alexa Fluor 488 Donkey Anti-Mouse IgG (H+L)                     | Jackson ImmunoResearch | 715-546-150 |
| Alexa Fluor 488 Donkey Anti-Rabbit IgG (H+L)                    | Jackson ImmunoResearch | 711-546-152 |

|                                                                                       |                        |             |
|---------------------------------------------------------------------------------------|------------------------|-------------|
| Alexa Fluor 488 Donkey Anti-Goat IgG (H+L)                                            | Jackson ImmunoResearch | 705-546-147 |
| Alexa Fluor 488 Donkey Donkey Anti-Chicken IgY (Ig G) (H+L)                           | Jackson ImmunoResearch | 703-546-155 |
| Cyanine Cy <sup>TM</sup> 3 Donkey Anti-Mouse IgG (H+L)                                | Jackson ImmunoResearch | 715-166-150 |
| Cyanine Cy <sup>TM</sup> 3 Donkey Anti-Rabbit IgG (H+L)                               | Jackson ImmunoResearch | 711-166-152 |
| Cyanine Cy <sup>TM</sup> 3 Donkey Anti-Goat IgG (H+L)                                 | Jackson ImmunoResearch | 705-166-147 |
| Alexa Fluor 647 Donkey Anti-Mouse IgG (H+L)                                           | Jackson ImmunoResearch | 715-606-150 |
| Alexa Fluor 647 Donkey Anti-Rabbit IgG (H+L)                                          | Jackson ImmunoResearch | 711-606-152 |
| Alexa Fluor 647 Donkey Anti-Goat IgG (H+L)                                            | Jackson ImmunoResearch | 705-606-147 |
| Normal Donkey Serum                                                                   | Jackson ImmunoResearch | 017-000-121 |
|                                                                                       |                        |             |
| Bacterial and virus strains                                                           |                        |             |
| DH5 $\alpha$                                                                          | Enzynomics             | CP011       |
| AAV2- $\alpha$ Prox1 (AAV2/2-EF1 $\alpha$ -IL2'SP-anti-PROX1-scFv(1 A11)-FLAG)        | This paper             | N/A         |
| AAV2-Ctrl Ab (AAV2/2-EF1 $\alpha$ -IL2'SP-Control scFv(N1T1 D6)-FLAG)                 | This paper             | N/A         |
|                                                                                       |                        |             |
| Chemicals, peptides, and recombinant proteins                                         |                        |             |
| Tamoxifen                                                                             | Sigma                  | T5648       |
| MNU (N-Nitroso-N-methylurea)                                                          | Spectrum chemical      | N2939       |
| NMDA (N-Methyl-D-aspartic acid)                                                       | Sigma                  | M3262       |
| 2,2,2-Tribromoethanol                                                                 | Sigma                  | T48402      |
| Hoechst33342                                                                          | invitrogen             | H1399       |
| In situ Cell Death Detection Kit, Fluorescein                                         | Roche                  | 11684795910 |
| In situ Cell death Detection Kit, TMR-red                                             | Roche                  | 12156792910 |
| EdU (5-ethynyl-2'-deoxyuridine)                                                       | invitrogen             | E10187      |
| Click-iT EdU Alexa Fluor 647 Imaging Kit                                              | invitrogen             | C10340      |
| 3XFLAG peptide                                                                        | Sigma                  | F4799       |
| FLAG-Prox1 protein                                                                    | This paper             | N/A         |
| Protein G Sepharose 4 Fast Flow                                                       | GE Healthcare          | 17-0618-01  |
| Ni-NTA Chelating Agarose CL-6B                                                        | Peptron                | 1103        |
| O.C.T. Compound                                                                       | Scigen                 | 4586        |
| Fluorescence Mounting Medium                                                          | Dako                   | S3023       |
| RNAscope® Intro Pack for Multiplex Fluorescent Reagent Kit v2- Mm with TSA Vivid Dyes | ACDbio                 | 323280      |
| RNA-Protein Co-Detection Ancillary Kit                                                | ACDbio                 | 323180      |
| AllPrep DNA/RNA/Protein Mini kit                                                      | Qiagen                 | 80004       |
| DMEM/High glucose                                                                     | Hyclone                | SH30243     |
| Fetal Bovine Serum                                                                    | GIBCO                  | 12484010    |
| Penicillin-Streptomycin                                                               | Invitrogen             | 15140       |
| GenJet In Vitro DNA Transfection Reagent (Ver. II)                                    | SignaGen               | SL100489    |
| Grace's insect medium                                                                 | GIBCO                  | 11605-094   |
| Poloxamer 188 solution                                                                | Sigma                  | P5556       |
| Gentamicin                                                                            | GIBCO                  | 15710-064   |
| Cellfectin II Reagent                                                                 | GIBCO                  | 10362       |
|                                                                                       |                        |             |
| Experimental models: Cell lines                                                       |                        |             |

|                                                                                        |                    |                           |
|----------------------------------------------------------------------------------------|--------------------|---------------------------|
| Human: HeLa cells                                                                      | ATCC               | RRID: CVCL_0030           |
| Insect: Sf9 cells                                                                      | ATCC               | RRID: CVCL_0549           |
| Experimental models: Organisms/strains                                                 |                    |                           |
| Mouse: Prox1 <sup>tm1.1Fuma</sup> (Prox1 <sup>fg</sup> )                               | RIKEN CDB          | CDB0482K                  |
| Mouse: Dkk3 <sup>tm1Tfur</sup> (Dkk3-Cre)                                              | RIKEN BRC          | RBRC05427                 |
| Mouse: Tg(Chx10-cre/ERT2)G7Tfur (Chx10-CreERT2)                                        | RIKEN BRC          | RBRC05565                 |
| Mouse: Tg(Slc1a3-cre/ERT)1Nat/J (Glast-CreERT)                                         | Jackson Laboratory | 012586                    |
| Mouse: Tg(Crx-cre/ERT2)1Tfur (Crx-CreERT2)                                             | RIKEN BRC          | RBRC05559                 |
| Mouse: B6.CXB1-Pde6b <sup>rd10</sup> /J (Pde6b <sup>rd10</sup> )                       | Jackson Laboratory | 004297                    |
| Mouse: C57BL/6J-Rp1 <sup>tvrm64</sup> /PjnMmjax (Rp1 <sup>tvrm</sup> )                 | Jackson Laboratory | 043579                    |
| Mouse: B6.129P2-Gt(ROSA)26Sor <sup>tm1(DTA)Lky</sup> /J (R26 <sup>DTA</sup> )          | Jackson Laboratory | 009669                    |
| Mouse: B6.Cg-Gt(ROSA)26Sor <sup>tm14(CAG-tdTomato)Hze</sup> /J (R26 <sup>tdTom</sup> ) | Jackson Laboratory | 007914                    |
| Mouse: B6;129S-Gt(ROSA)26Sor/J (R26 <sup>LacZ</sup> )                                  | Jackson Laboratory | 002073                    |
| Zebrafish: Tg(gfap:EGFP)                                                               |                    | ZDB-TGCON STRCT-0704 10-2 |
| Oligonucleotides                                                                       |                    |                           |
| RT-qPCR: Prox1 Forward: CACTCATAAAGTCTGAGTGT                                           | This paper         | N/A                       |
| RT-qPCR: Prox1 Reverse: GGTGTAAAAGAACATGAGTT                                           | This paper         | N/A                       |
| RT-qPCR: GS Forward: TTATGGGAACAGACGGCCAC                                              | This paper         | N/A                       |
| RT-qPCR: GS Reverse: GGTAGTGAGCCTCCACGATG                                              | This paper         | N/A                       |
| RT-qPCR: Pkca Forward: AAGGCAACATGGAACCTCAGG                                           | This paper         | N/A                       |
| RT-qPCR: Pkca Reverse: TGTCAGCAAGCATCACCTTC                                            | This paper         | N/A                       |
| RT-qPCR: Rhodopsin Forward: GCAGCCTTGGTCTCTGTCTAC                                      | This paper         | N/A                       |
| RT-qPCR: Rhodopsin Reverse: GAAGTTGCTCATCGGCTTGC                                       | This paper         | N/A                       |
| RT-qPCR: Actb1 Forward: TTTCCAGCCTTCCTTCTTGG                                           | This paper         | N/A                       |
| RT-qPCR: Actb1 Reverse: GGCATAGAGGTCTTTACGGATG                                         | This paper         | N/A                       |
| RNAscope probe<br>Probe-Mm-Prox1-C1                                                    | ACDbio             | 488591                    |
| Recombinant DNA                                                                        |                    |                           |
| pCAG-V5-PROX1-IRES-EGFP                                                                | Lee et al., 2019   | N/A                       |

|                                           |                       |                                                                                                                           |
|-------------------------------------------|-----------------------|---------------------------------------------------------------------------------------------------------------------------|
| pCAG-V5-OTX2-IRES-EGFP                    | Lee et al., 2019      | N/A                                                                                                                       |
| pCAG-LoxP-STOP-LoxP-V5-PROX1-IRES-ZsGreen | This paper            | N/A                                                                                                                       |
|                                           |                       |                                                                                                                           |
| Software and algorithms                   |                       |                                                                                                                           |
| Fluoview 4.0                              | Olympus Corporation   | N/A                                                                                                                       |
| Multi Gauge V3.0                          | Fujifilm Life Science | N/A                                                                                                                       |
| OptoMotry HD System                       | CerebralMechanics     | <a href="http://cerebralmechanics.com/">http://cerebralmechanics.com/</a>                                                 |
| Phoenix MICRON Ganzfeld ERG               | Phoenix-MICRON        | <a href="https://phoenixmicron.com/">https://phoenixmicron.com/</a>                                                       |
| Python 3.11                               | N/A                   | <a href="https://www.python.org/downloads/release/python-3110/">https://www.python.org/downloads/release/python-3110/</a> |
| Monocle3                                  | Cole Trapnell         |                                                                                                                           |
| Seurat                                    | SatijaLab             |                                                                                                                           |
| StarDist                                  | N/A                   | <a href="https://github.com/stardist/stardist">https://github.com/stardist/stardist</a>                                   |



Supplementary Material 1. Electronic medical record (EMR) of healthy donor.

[REDACTED]

[REDACTED]

[REDACTED]

**Discharge Summary** [REDACTED] **at 10/10/2022 10:47 AM**

---

Filed: 10/10/2022 10:50 AM      Service: —      Author Type: Physician  
Date of Service: 10/10/2022 10:47 AM      Note Type: Discharge Summary

Status: Signed      [REDACTED]

**DISCHARGE SUMMARY**  
Date of service: 10/10/2022

[REDACTED]

83 y.o.  
[REDACTED]

**Admit date:** 10/4/2022

**Discharge date:** 10/10/2022

**Admission Diagnoses:** neutropenic fever

**Discharge Diagnoses:**  
Principal Problem:  
Neutropenic fever (HRC)  
Active Problems:  
Hyperlipidemia (HRC)  
Idiopathic peripheral neuropathy  
Mild intermittent asthma without complication (HRC)  
Chronic diastolic heart failure (HRC)  
Coronary artery disease involving native coronary artery of native heart without angina pectoris (HRC)  
Essential tremor (HRC)  
MDS (myelodysplastic syndrome) (HRC)  
Pancytopenia (HRC)

**Hospital Course:**  
83 y.o. female with pmhx HLD, Asthma, CHF, MDS with blasts nearing threshold of transformation to AML undergoing chemo last dose 10 days, started hydrea in anticipation of venetoclax admitted for neutropenic fever with CAP.  
Has since transitioned to hospice

**Active problems:**  
Patient Active Hospital Problem List:

Neutropenic fever (HRC) (10/5/2022)  
MDS (myelodysplastic syndrome) (HRC) (8/16/2022)

[REDACTED]

Supplementary Material 2. Electronic medical record (EMR) of RP donor.

|                                                                                                                                                                                                                                                                                                                                                                                                                                          |        |                                     |  |
|------------------------------------------------------------------------------------------------------------------------------------------------------------------------------------------------------------------------------------------------------------------------------------------------------------------------------------------------------------------------------------------------------------------------------------------|--------|-------------------------------------|--|
|                                                                                                                                                                                                                                                                                                                                                                                                                                          |        | Date of Service: 9/28/2022 12:14 AM |  |
| Signed                                                                                                                                                                                                                                                                                                                                                                                                                                   |        |                                     |  |
| Signed                                                                                                                                                                                                                                                                                                                                                                                                                                   | 79 y o | female                              |  |
| <b>CHIEF COMPLAINT:</b><br>Cardiac Arrest                                                                                                                                                                                                                                                                                                                                                                                                |        |                                     |  |
| <b>HPI</b><br>History is limited given the condition of the patient<br><br>History provided by husband.<br><br>79-year-old female presents with unresponsiveness. Husband states that the patient had a fairly normal day today and then started vomiting tonight. On their way in, she has become unresponsive.                                                                                                                         |        |                                     |  |
| <b>ALLERGIES:</b><br>Lisinopril and Sulfa (sulfonamide antibiotics)                                                                                                                                                                                                                                                                                                                                                                      |        |                                     |  |
| <b>CURRENT MEDICATIONS</b> acetaminophen (TYLENOL EXTRA STRENGTH) 500 mg tablet<br>amlodipine (NORVASC) 5 mg tablet<br>aspirin (ECOTRIN) 81 mg enteric coated tablet<br>atenolol (TENORMIN) 50 mg tablet<br>chlorthalidone (HYGROTON) 25 mg tablet<br>cholecalciferol (VITAMIN D-3) 2,000 unit capsule<br>levothyroxine (Euthyrox) 100 mcg tablet<br>sertraline (ZOLOFT) 50 mg tablet<br>triamcinolone (ARISTOCORT; KENALOG) 0.1 % cream |        |                                     |  |
| <b>PROBLEM LIST:</b><br>HYPOTHYROIDISM<br><br>Morbid obesity with BMI of 40.0-44.9, adult (HC)<br><br>Pulmonary artery hypertension (HC)<br><br>OSA (obstructive sleep apnea)<br><br>Retinitis pigmentosa<br><br>PAD (peripheral artery disease) (HC)<br><br>Venous insufficiency of left leg<br><br>Left atrial enlargement<br><br>Osteopenia<br><br>Hyperlipemia<br><br>Major depressive disorder, recurrent episode, moderate (HC)    |        |                                     |  |
